# Supplementary material for: Development and Characterization of Novel Selective, Non-Basic Dopamine D2 Receptor Antagonists for the Treatment of Schizophrenia
Source: MDPI journal article supplement (doi:10.3390/molecules28104211), 2023-05-20

## *Supplementary Information*

# **Development and characterization of novel selective, non-basic dopamine D<sub>2</sub> receptor antagonists for the treatment of schizophrenia**

**Piotr Stępnicki <sup>1,\*</sup>, Sylwia Wośko <sup>2</sup>, Agata Bartyzel <sup>3</sup>, Agata Zięba <sup>1</sup>, Damian Bartuzi <sup>1,4</sup>, Klaudia Szałaj <sup>5</sup>, Tomasz M. Wróbel <sup>1</sup>, Emilia Fornal <sup>5</sup>, Jens Carlsson <sup>4</sup>, Ewa Kędzierska <sup>6</sup>, Ewa Poleszak <sup>2</sup>, Marián Castro <sup>7,8</sup> and Agnieszka A. Kaczor <sup>1,9,\*</sup>**

<sup>1</sup> Department of Synthesis and Chemical Technology of Pharmaceutical Substances, Faculty of Pharmacy, Medical University of Lublin, 4A Chodźki St., PL-20093 Lublin, Poland;

<sup>2</sup> Laboratory of Preclinical Testing, Chair and Department of Applied and Social Pharmacy, Faculty of Pharmacy, Medical University of Lublin, Chodźki 1, PL-20093 Lublin, Poland;

<sup>3</sup> Department of General and Coordination Chemistry and Crystallography, Institute of Chemical Sciences, Faculty of Chemistry, Maria Curie-Skłodowska University in Lublin, Maria Curie-Skłodowska Sq. 2, PL-20031 Lublin, Poland;

<sup>4</sup> Science for Life Laboratory, Department of Cell and Molecular Biology, Uppsala University, 75124, Uppsala, Sweden;

<sup>5</sup> Department of Bioanalytics, Chair of Dietetics and Bioanalytics, Faculty of Biomedicine, Medical University of Lublin, Jaczewskiego 8b St., PL-20090 Lublin, Poland;

<sup>6</sup> Department of Pharmacology and Pharmacodynamics, Faculty of Pharmacy, Medical University of Lublin, 4A Chodźki St., PL-20093 Lublin, Poland;

<sup>7</sup> Center for Research in Molecular Medicine and Chronic Diseases (CiMUS), Universidade de Santiago de Compostela, Avda de Barcelona, E-15782 Santiago de Compostela, Spain;

<sup>8</sup> Instituto de Investigación Sanitaria de Santiago de Compostela (IDIS), Travesía da Choupana s/n, E-15706 Santiago de Compostela, Spain;

<sup>9</sup> School of Pharmacy, University of Eastern Finland, P.O. Box 1627, FI-70211 Kuopio, Finland;

\* Correspondence: piotrstepnicki93@gmail.com (P.S.), agnieszka.kaczor@umlub.pl (A.A.K.)

**Content:**

**Figure S1.** Packing diagrams of **17** viewed along the *b*-axis showing formation of the infinite chains along [010] generated by N2-H2N $\cdots$ O2 hydrogen bonds.

**Figure S2.** Part of the crystal structure of **17** showing C(8) infinite chain motif linked by N2-H2N $\cdots$ O2 hydrogen bonds propagating in the *b*-axis direction. Atoms involved in chain motif formation are shown in ball stick format. Symmetry code: (i) *x*, *y*-1, *z*.

**Table S1.** Interatomic distances and selected bond angles for compound **17**.

**Table S2.** Detailed experimental conditions employed in radioligand binding assays.

**Table S3.** Crystal data and structure refinement for compound **17**.

NMR and HRMS spectra of reported compounds.

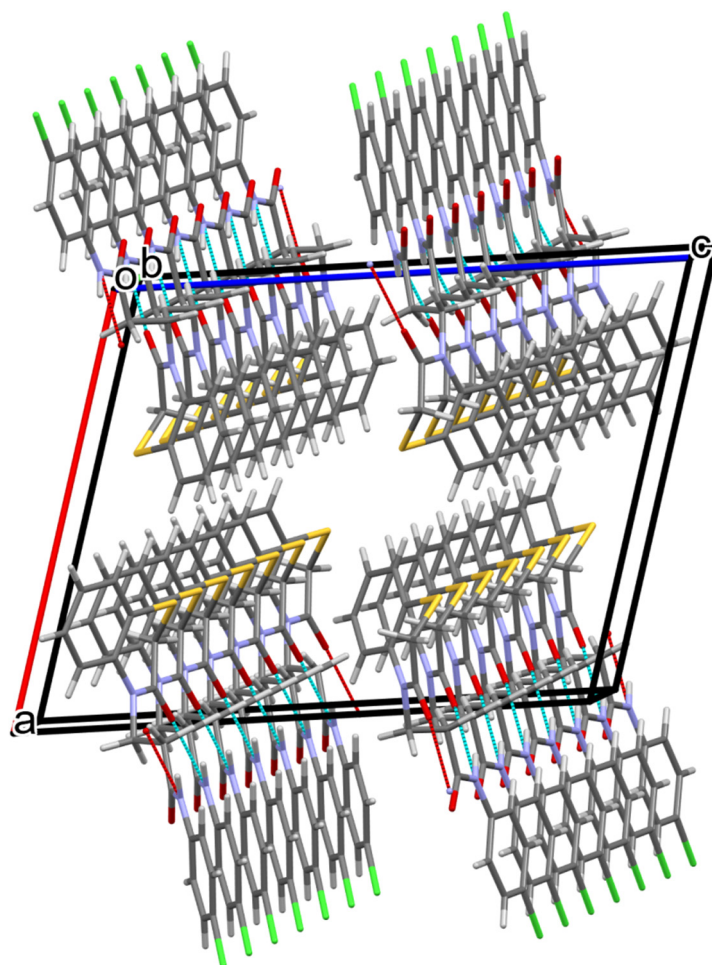

**Figure S1.** Packing diagrams of **17** viewed along the *b*-axis showing formation of the infinite chains along [010] generated by N2-H2N $\cdots$ O2 hydrogen bonds.

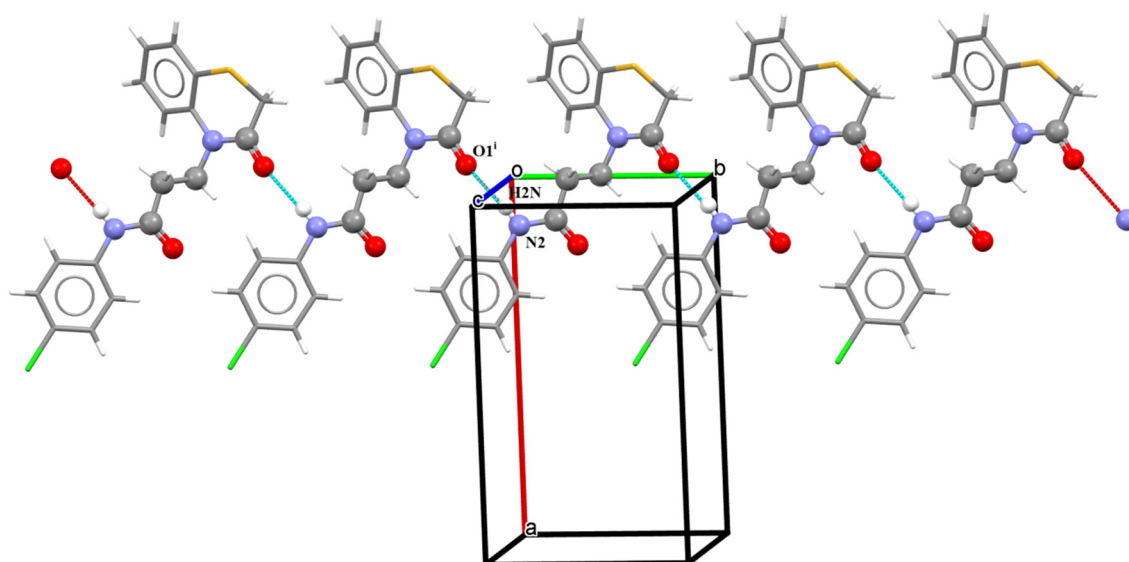

**Figure S2.** Part of the crystal structure of **17** showing C(8) infinite chain motif linked by N2-H2N $\cdots$ O2 hydrogen bonds propagating in the *b*-axis direction. Atoms involved in chain motif formation are shown in ball stick format. Symmetry code: (i)  $x, y-1, z$ .

**Table S1.** Interatomic distances and selected bond angles for compound **17**.

---

|                                  |          |                |          |
|----------------------------------|----------|----------------|----------|
| <i><b>Bond lengths (Å)</b></i>   |          |                |          |
| C1–O1                            | 1.226(4) | C9–C10         | 1.507(5) |
| C1–N1                            | 1.355(4) | C10–C11        | 1.509(5) |
| C1–C2                            | 1.498(5) | O2–C11         | 1.204(4) |
| C2–S1                            | 1.789(4) | C12–C17        | 1.384(4) |
| C3–C8                            | 1.387(4) | C12–C13        | 1.385(4) |
| C3–C4                            | 1.389(4) | C12–N2         | 1.414(4) |
| C3–S1                            | 1.754(4) | C13–C14        | 1.376(4) |
| C4–C5                            | 1.367(5) | C14–C15        | 1.375(5) |
| C5–C6                            | 1.364(5) | C15–C16        | 1.365(5) |
| C6–C7                            | 1.381(5) | C15–C11        | 1.740(4) |
| C7–C8                            | 1.386(5) | C16–C17        | 1.381(5) |
| C8–N1                            | 1.434(4) | N2–C11         | 1.341(5) |
| C9–N1                            | 1.473(4) |                |          |
| <i><b>Bond angles (°)</b></i>    |          |                |          |
| O1–C1–N1                         | 122.2(3) | C14–C15–C11    | 119.4(3) |
| O1–C1–C2                         | 121.1(4) | C11–N2–C12     | 128.8(3) |
| N1–C9–C10                        | 111.3(3) | O2–C11–N2      | 122.7(4) |
| C16–C15–C11                      | 120.2(3) | O2–C11–C10     | 122.1(4) |
| <i><b>Torsion angles (°)</b></i> |          |                |          |
| C3–C8–N1–C1                      | -26.9(5) | C10–C9–N1–C8   | -65.8(5) |
| C2–C1–N1–C8                      | -2.7(5)  | C10–C9–N1–C1   | 109.7(4) |
| N1–C1–C2–S1                      | 49.3(4)  | C12–N2–C11–O2  | 3.3(8)   |
| C1–C2–S1–C3                      | -59.2(3) | C9–C10–C11–O2  | 28.9(7)  |
| C8–C3–S1–C2                      | 35.1(3)  | C17–C12–N2–C11 | 175.7(4) |
| S1–C3–C8–N1                      | 3.2(5)   | C13–C12–N2–C11 | -5.3(7)  |

---

**Table S2.** Detailed experimental conditions employed in radioligand binding assays.

|                            | <i>hD</i> <sub>1</sub>                                                                | <i>hD</i> <sub>2</sub>                                                                | <i>hD</i> <sub>3</sub>                                                                | <i>h5</i> -HT <sub>1A</sub>                                                           | <i>h5</i> -HT <sub>2A</sub>                                                           | <i>h5</i> -HT <sub>7</sub>                                                                               |
|----------------------------|---------------------------------------------------------------------------------------|---------------------------------------------------------------------------------------|---------------------------------------------------------------------------------------|---------------------------------------------------------------------------------------|---------------------------------------------------------------------------------------|----------------------------------------------------------------------------------------------------------|
| Protein per well           | 12 µg                                                                                 | 35 µg                                                                                 | 2 µg                                                                                  | 10 µg                                                                                 | 130 µg                                                                                | 2 µg                                                                                                     |
| Assay buffer               | 50 mM Tris-HCl, 5 mM MgCl <sub>2</sub> (pH = 7.4)                                     | 50 mM Tris-HCl, 120 mM NaCl, 5 mM KCl, 5 mM MgCl <sub>2</sub> , 1 mM EDTA (pH = 7.4)  | 50 mM Tris-HCl, 5 mM MgCl <sub>2</sub> (pH = 7.4)                                     | 50 mM Tris-HCl, 5 mM MgSO <sub>4</sub> (pH = 7.4)                                     | 50 mM Tris-HCl (pH = 7.5)                                                             | 50 mM Tris-HCl, 4 mM CaCl <sub>2</sub> , 1 mM L-Ascorbic acid, 0.1 mM Pargyline hydrochloride (pH = 7.4) |
| Radioligand                | 0.7 nM [ <sup>3</sup> H]- SCH-23390 <sup>a</sup>                                      | 0.6 nM [ <sup>3</sup> H]- Spiperone <sup>b</sup>                                      | 1 nM [ <sup>3</sup> H]- Spiperone <sup>b</sup>                                        | 1 nM [ <sup>3</sup> H]-8-OH-DPAT <sup>c</sup>                                         | 1.25 nM [ <sup>3</sup> H]- Ketanserin <sup>d</sup>                                    | 2 nM [ <sup>3</sup> H]-SB269970 <sup>e</sup>                                                             |
| Nonspecific binding        | 1 µM (+)-Butaclamol                                                                   | 100 µM Sulpiride                                                                      | 1 µM Haloperidol                                                                      | 10 µM Serotonin                                                                       | 1 µM Methysergide                                                                     | 20 µM Clozapine                                                                                          |
| Incubation                 | 27°C/60 min                                                                           | 25°C/120 min                                                                          | 25°C/60 min                                                                           | 37°C/120 min                                                                          | 37°C/30 min                                                                           | 37°C/60 min                                                                                              |
| Filter plate               | GF/C <sup>f</sup>                                                                     | GF/C <sup>f</sup>                                                                     | GF/C <sup>f</sup>                                                                     | GF/C <sup>f</sup>                                                                     | GF/B <sup>g</sup>                                                                     | GF/C <sup>f</sup>                                                                                        |
| Filter plate pre-treatment | presoaked with 0.5% PEI <sup>h</sup> for 1 h and washed with 250 µl incubation buffer | presoaked with 0.5% PEI <sup>h</sup> for 1 h and washed with 250 µl incubation buffer | presoaked with 0.5% PEI <sup>h</sup> for 1 h and washed with 250 µl incubation buffer | presoaked with 0.5% PEI <sup>h</sup> for 1 h and washed with 250 µl incubation buffer | presoaked with 0.5% PEI <sup>h</sup> for 1 h and washed with 250 µl incubation buffer | presoaked with 0.5% PEI <sup>h</sup> for 1 h and washed with 250 µl incubation buffer                    |
| Wash buffer                | 50 mM Tris-HCl (pH = 7.4)                                                             | 50 mM Tris-HCl, 0.9% NaCl (pH = 7.4)                                                  | 50 mM Tris-HCl (pH = 7.4)                                                             | 50 mM Tris-HCl (pH = 7.4)                                                             | 50 mM Tris-HCl (pH = 6.6)                                                             | 50 mM Tris-HCl, 4 mM CaCl <sub>2</sub> , 1 mM L-Ascorbic acid, 0.1 mM Pargyline hydrochloride (pH = 7.4) |
| Washing steps              | 4 x 250 µl wash buffer                                                                | 6 x 250 µl wash buffer                                                                | 4 x 250 µl wash buffer                                                                                   |

<sup>a</sup> 83.2 Ci/mmol, 1 mCi/ml, PerkinElmer NET930250UC. <sup>b</sup> 54.3 Ci/mmol, 1 mCi/ml, PerkinElmer NET1187250UC. <sup>c</sup> 200 Ci/mmol, 1 mCi/ml, PerkinElmer NET929250UC. <sup>d</sup> 47.3 Ci/mmol, 1 mCi/ml, PerkinElmer NET791250UC. <sup>e</sup> 32.7 Ci/mmol, 0.25 mCi/ml, PerkinElmer NET1198U250UC. <sup>f</sup> MultiScreen<sub>HTS</sub> FB Filter Plate, PerkinElmer MSFCN6. <sup>g</sup> MultiScreen<sub>HTS</sub> FB Filter Plate, PerkinElmer MSFBN6. <sup>h</sup> PEI, Polyethyleneimine.

**Table S3.** Crystal data and structure refinement for compound **17**.

|                                                     |                                                                   |
|-----------------------------------------------------|-------------------------------------------------------------------|
| Formula                                             | C <sub>17</sub> H <sub>15</sub> ClN <sub>2</sub> O <sub>2</sub> S |
| Formula weight                                      | 346.82                                                            |
| Temperature K                                       | 298(2)                                                            |
| Crystal system                                      | monoclinic                                                        |
| Space group                                         | <i>P</i> 2 <sub>1</sub> / <i>c</i>                                |
| <i>a</i> (Å)                                        | 13.5626(11)                                                       |
| <i>b</i> (Å)                                        | 7.2478(5)                                                         |
| <i>c</i> (Å)                                        | 17.2446(17)                                                       |
| $\beta$ (°)                                         | 106.262(9)                                                        |
| Volume (Å <sup>3</sup> )                            | 1627.3(2)                                                         |
| <i>Z</i>                                            | 4                                                                 |
| Calculated density (g cm <sup>-3</sup> )            | 1.416                                                             |
| $\mu$ (mm <sup>-1</sup> )                           | 0.373                                                             |
| Absorption correction                               | multi-scan                                                        |
| <i>F</i> (000)                                      | 720                                                               |
| Crystal size (mm)                                   | 0.15 x 0.45 x 0.50                                                |
| $\theta$ range (°)                                  | 2.461 to 26.733                                                   |
| Limiting indices                                    | -17 ≤ <i>h</i> ≤ 17, -9 ≤ <i>k</i> ≤ 8, -19 ≤ <i>l</i> ≤ 21       |
| Reflections collected/unique                        | 12931/3458                                                        |
| <i>R</i> <sub>int</sub>                             | 0.0860                                                            |
| Data/restraints/parameters                          | 3458/0/213                                                        |
| GooF on <i>F</i> <sup>2</sup>                       | 1.029                                                             |
| Final <i>R</i> indices [ <i>I</i> > 2σ( <i>I</i> )] | <i>R</i> <sub>1</sub> = 0.0684, <i>wR</i> <sub>2</sub> = 0.1165   |
| <i>R</i> indices (all data)                         | <i>R</i> <sub>1</sub> = 0.1636, <i>wR</i> <sub>2</sub> = 0.1551   |
| Extinction coefficient                              | 0.0031(7)                                                         |
| Largest diff. peak/hole, e Å <sup>-3</sup>          | 0.406/-0.367                                                      |
| CCDC No.                                            | 2259221                                                           |

**3-(3-oxo-2,3-dihydro-4*H*-benzo[*b*][1,4]oxazin-4-yl)-*N*-(4-(trifluoromethyl)phenyl)propanamide (1)**

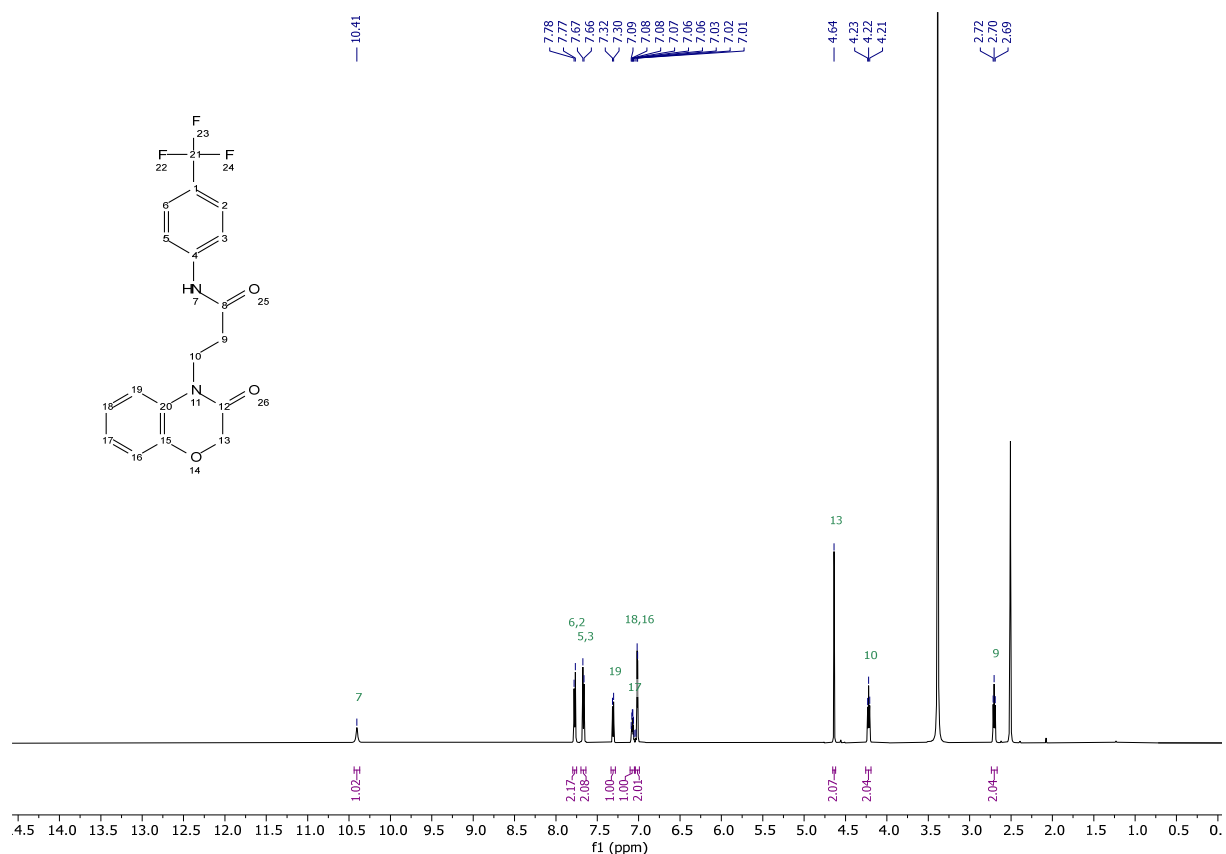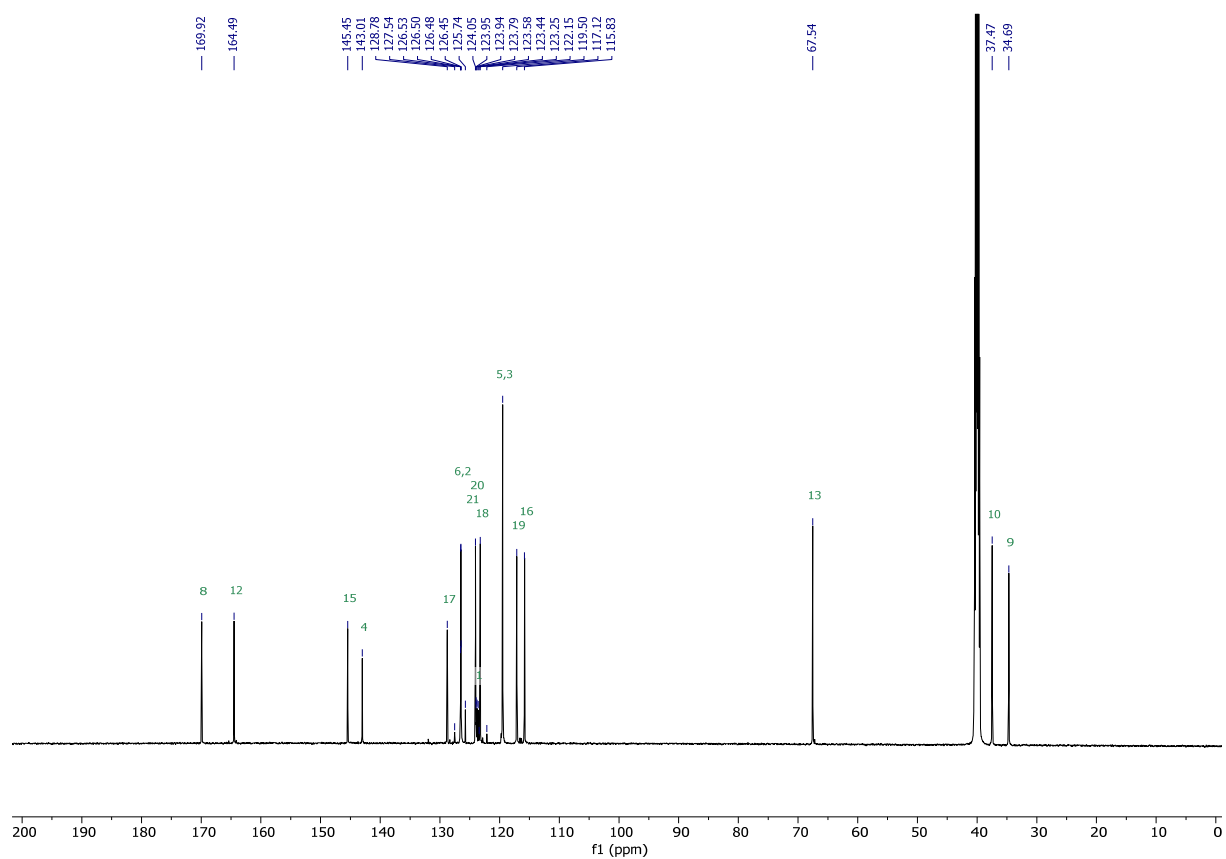

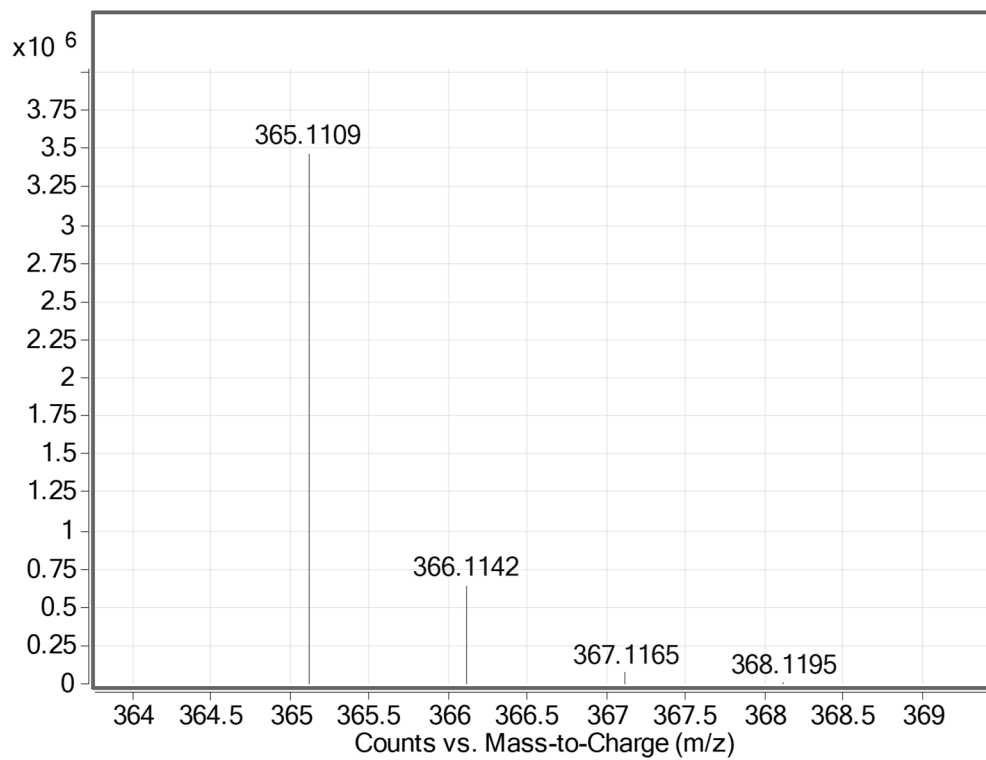



**3-(2-oxobenzo[d]thiazol-3(2H)-yl)-N-(4-(trifluoromethyl)phenyl)propanamide (2)**

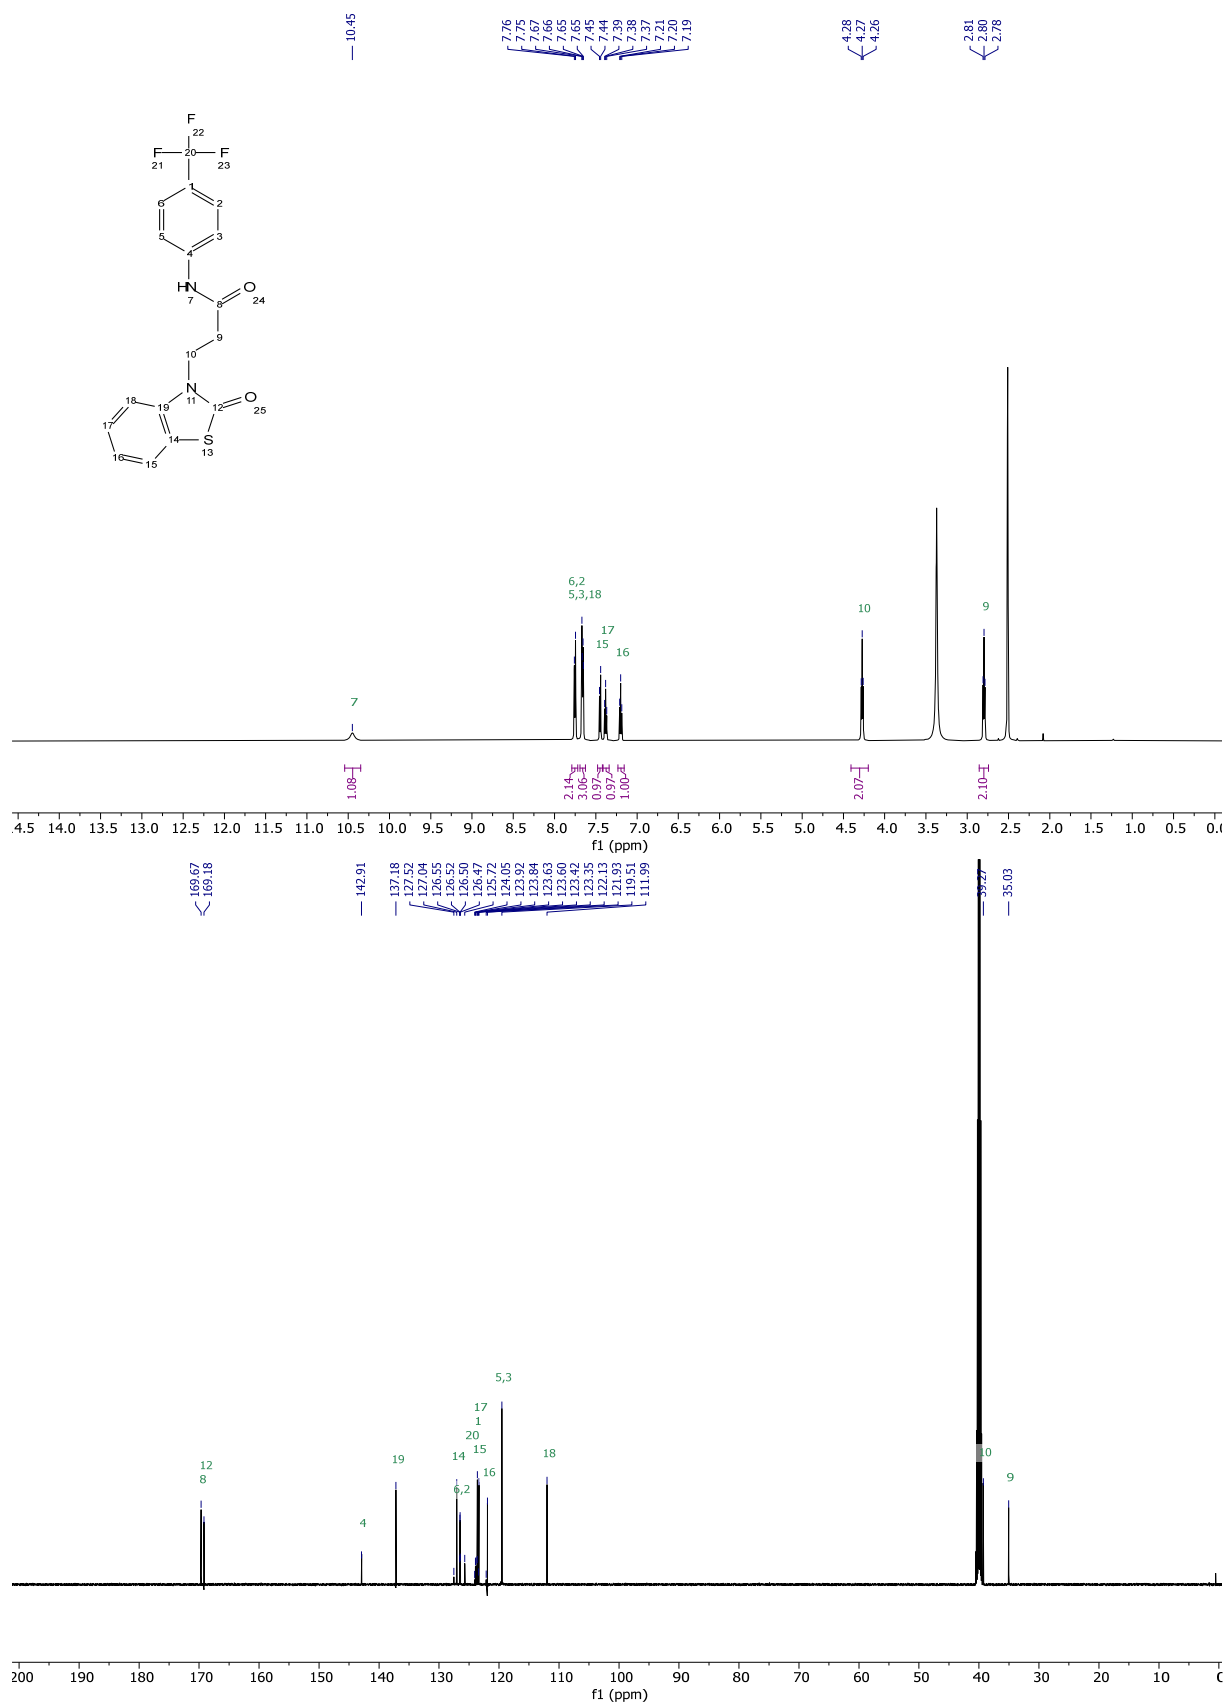

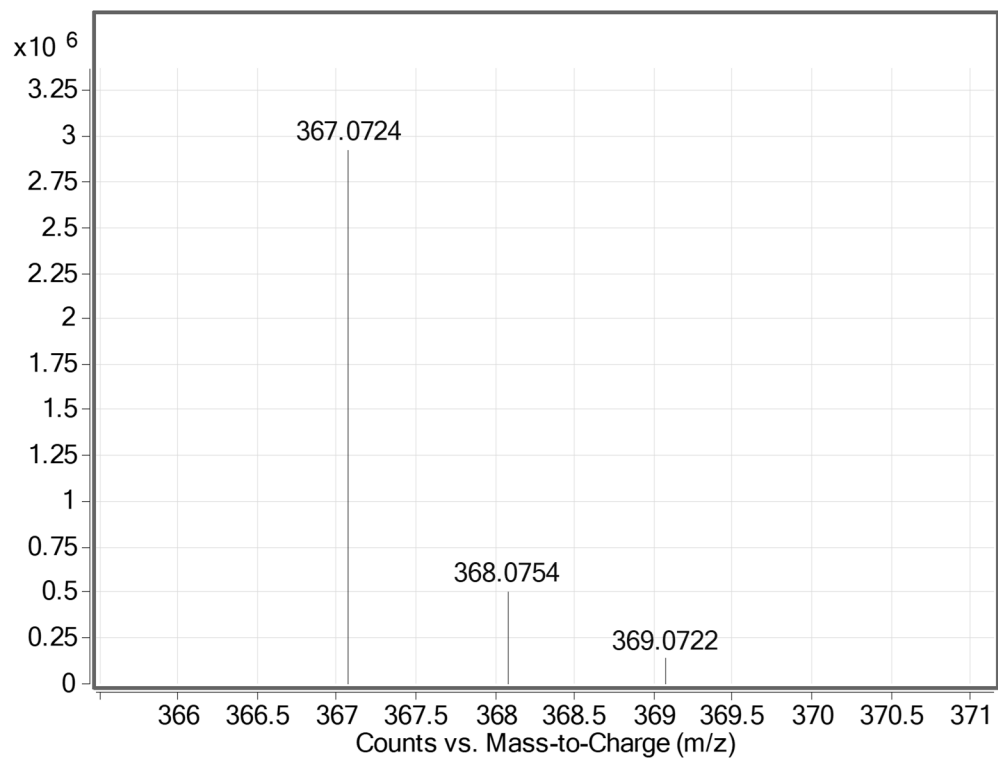

### 3-(2-oxobenzo[d]oxazol-3(2H)-yl)-N-(4-(trifluoromethyl)phenyl)propanamide (3)

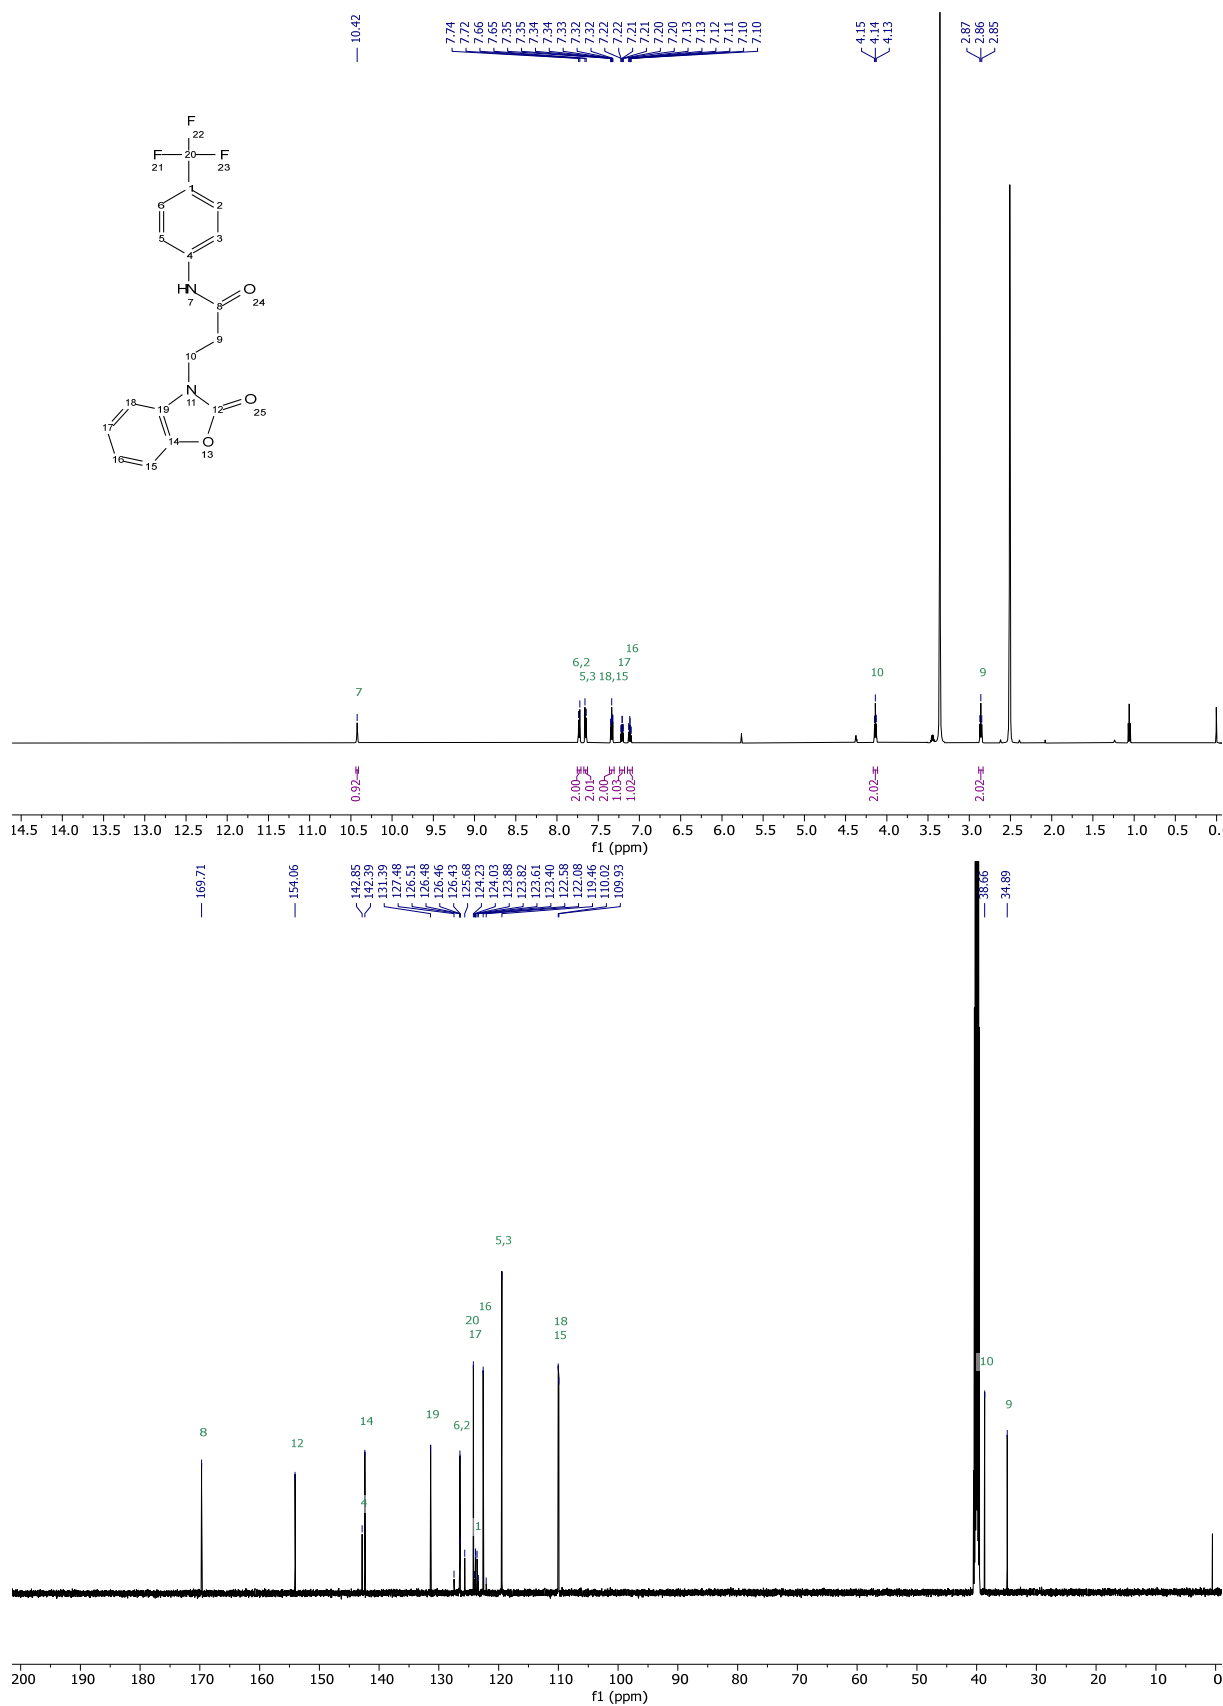

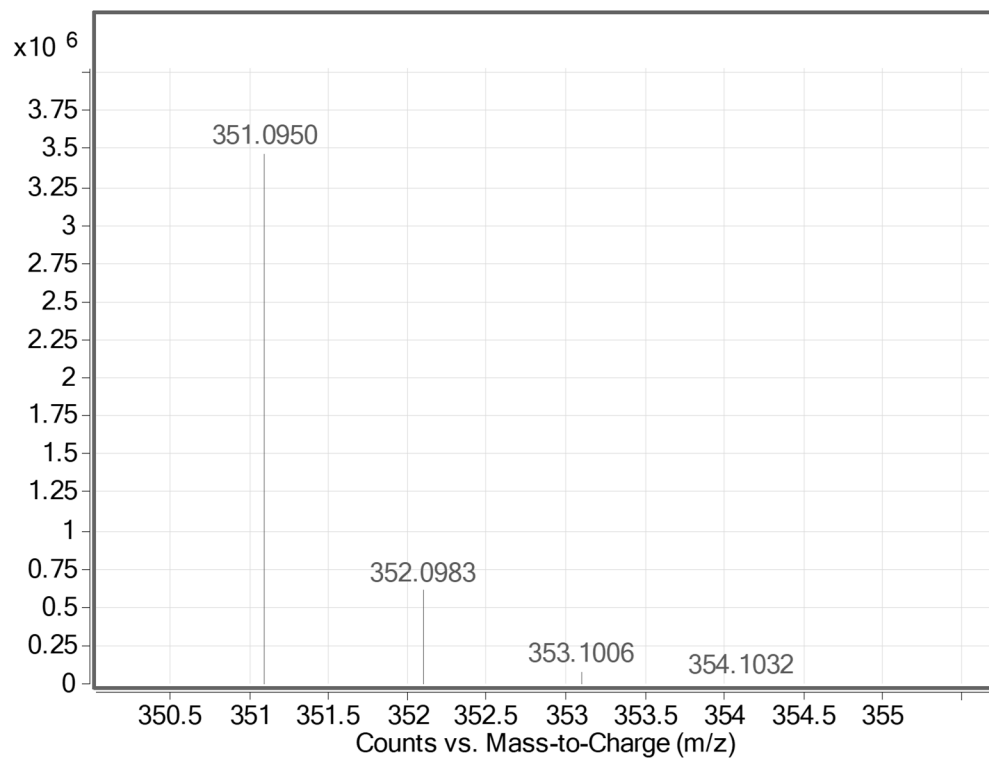

**3-(4-oxo-3,4-dihydrobenzo[b][1,4]oxazepin-5(2H)-yl)-N-(4-(trifluoromethyl)phenyl)propanamide (4)**

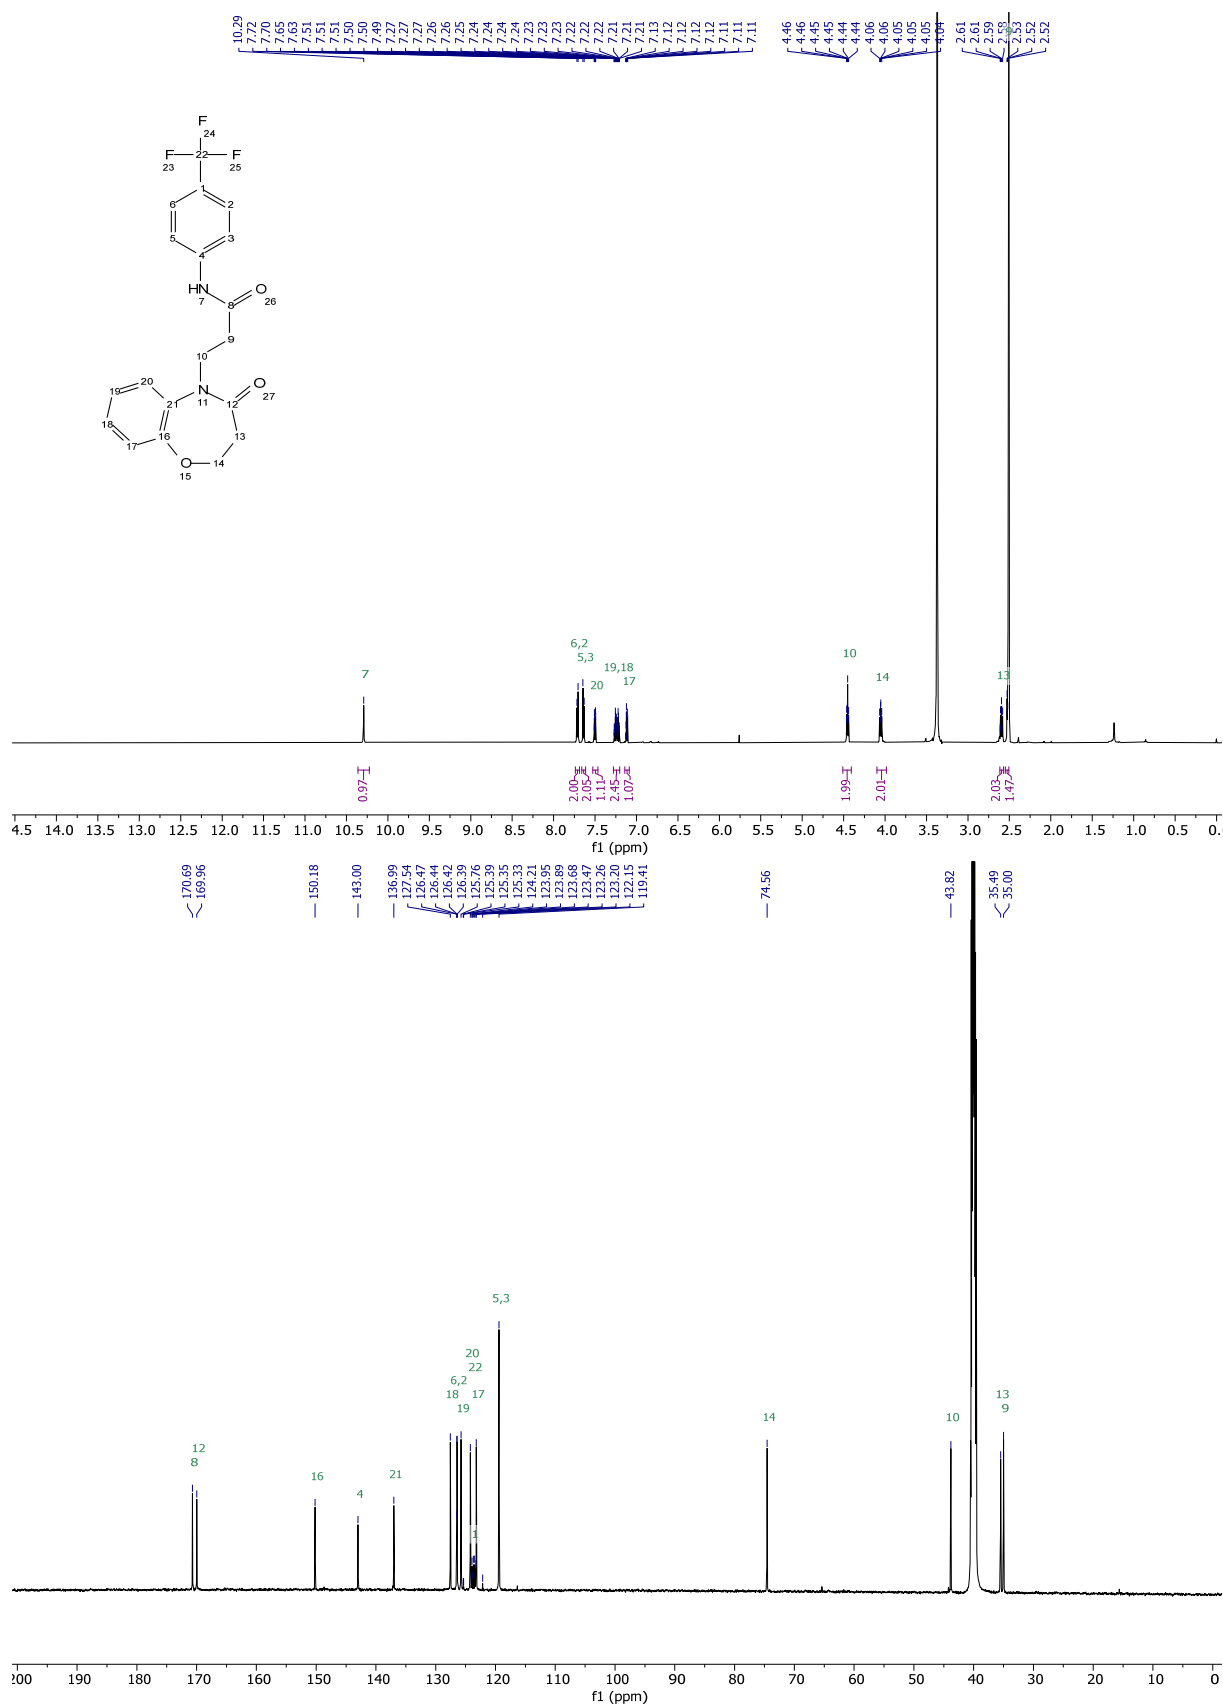

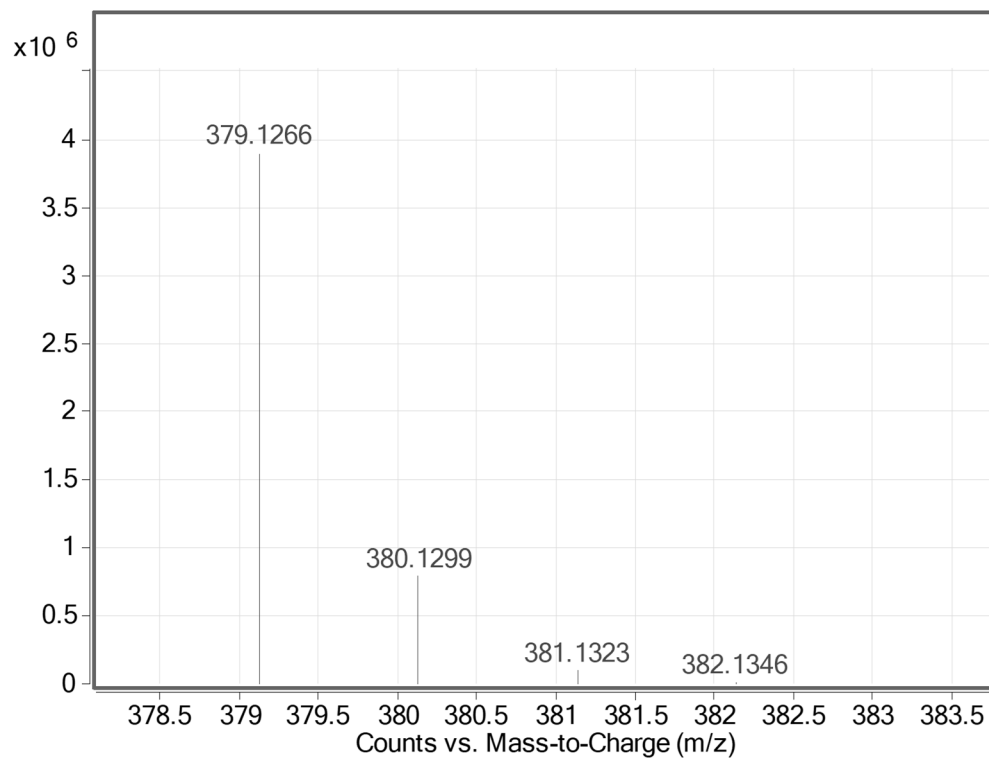

### 3-(3-oxothiomorpholino)-*N*-(4-(trifluoromethyl)phenyl)propanamide (5)

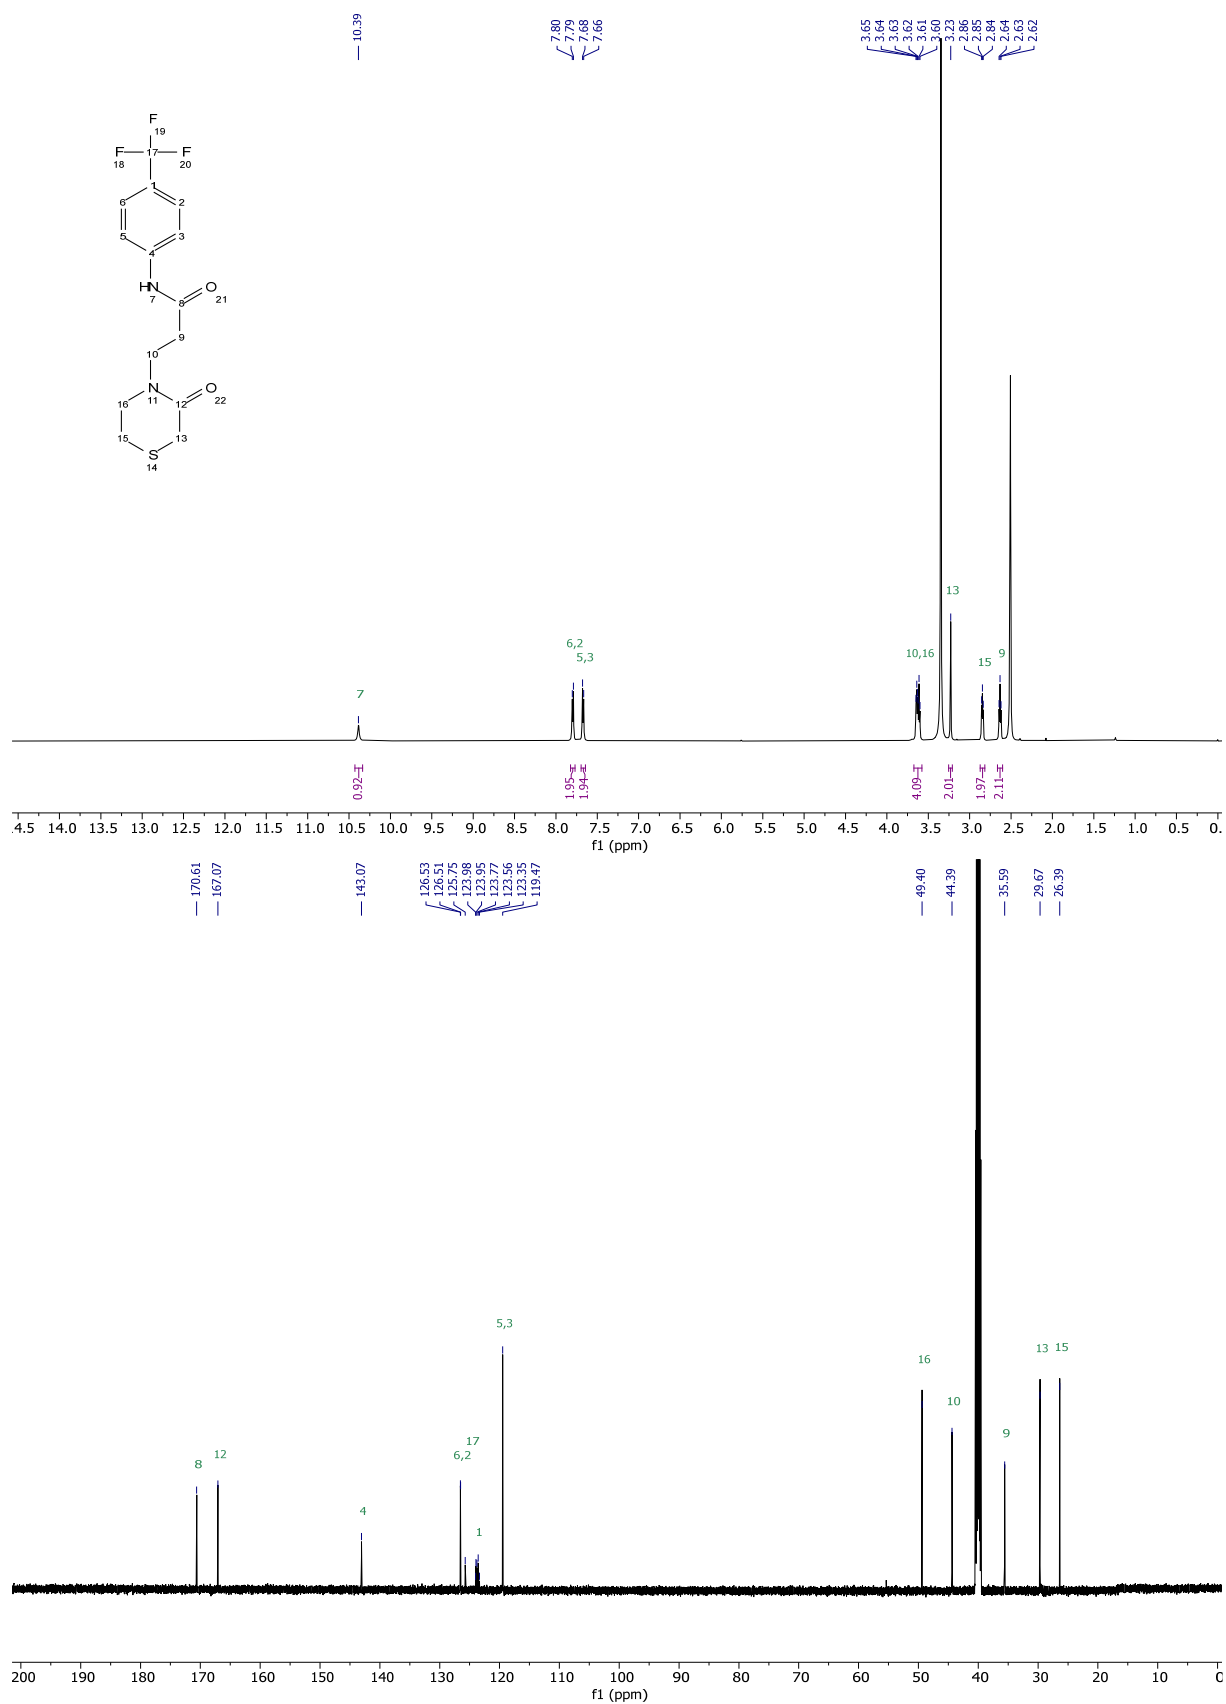

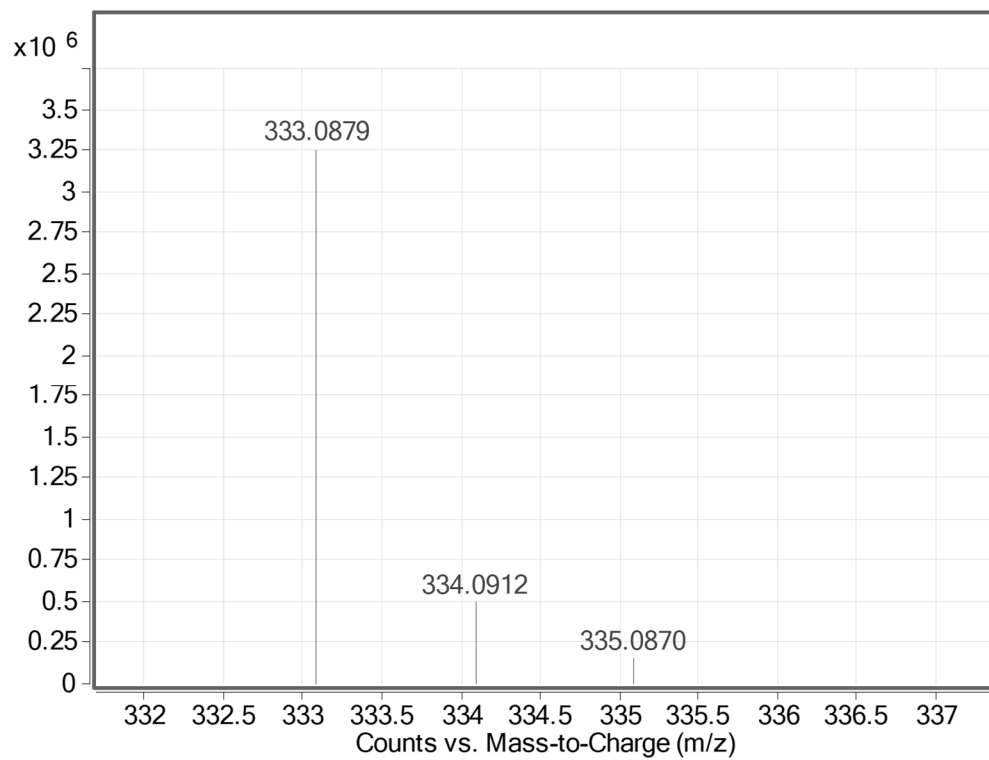



### 3-(2-oxopiperidin-1-yl)-*N*-(4-(trifluoromethyl)phenyl)propanamide (6)

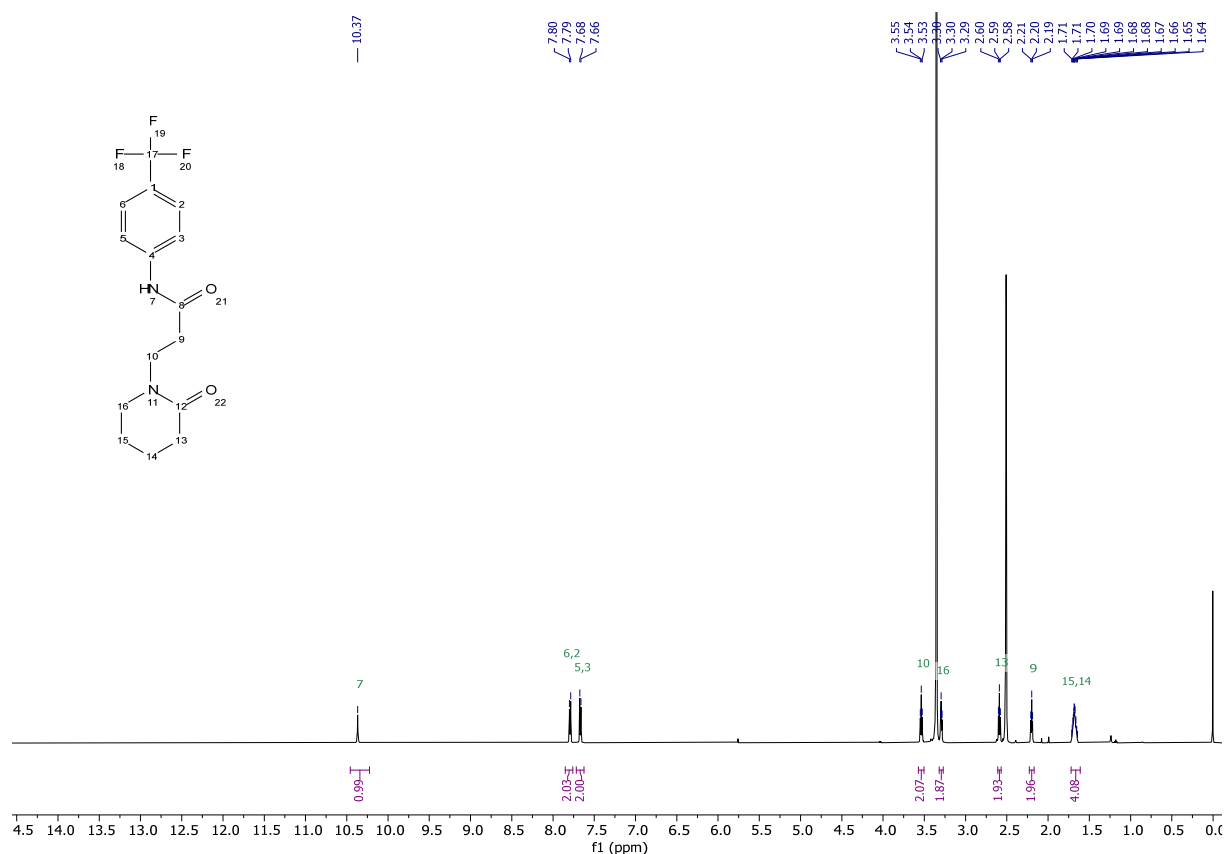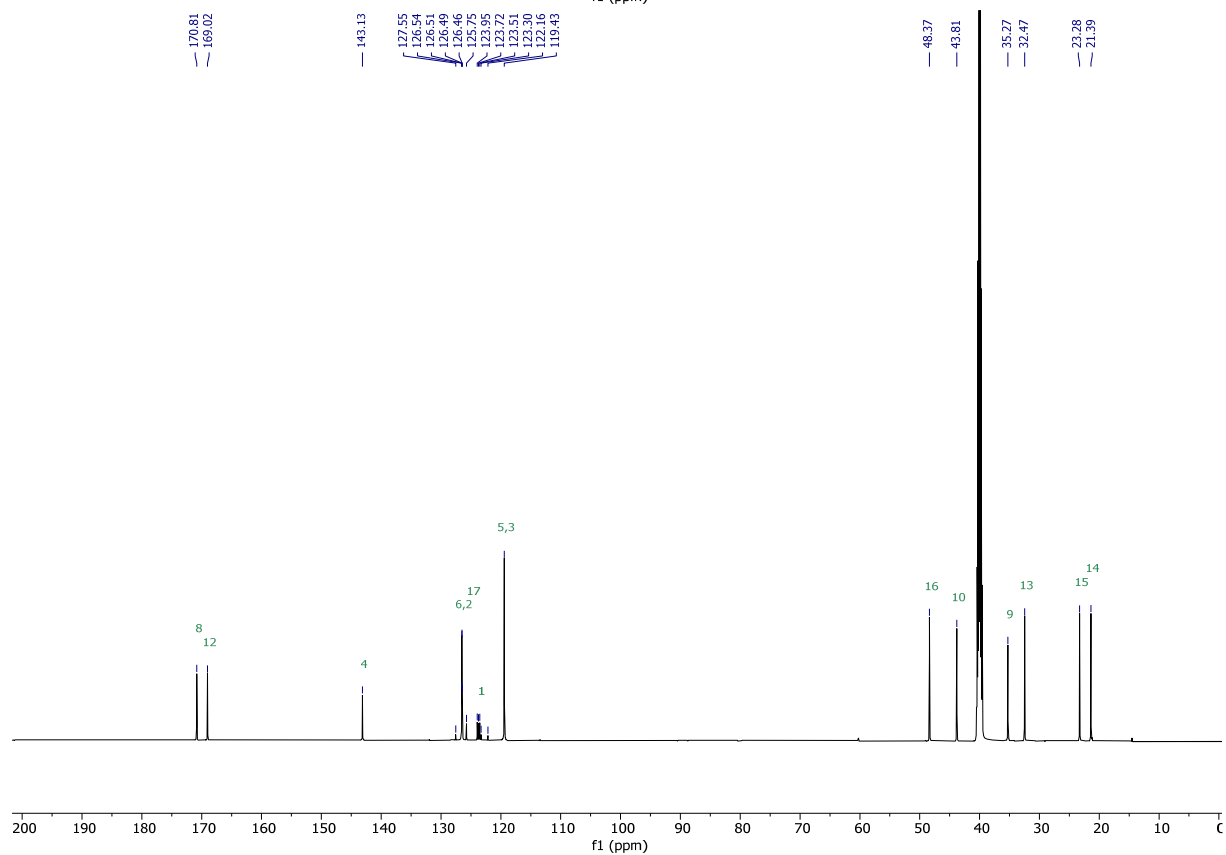

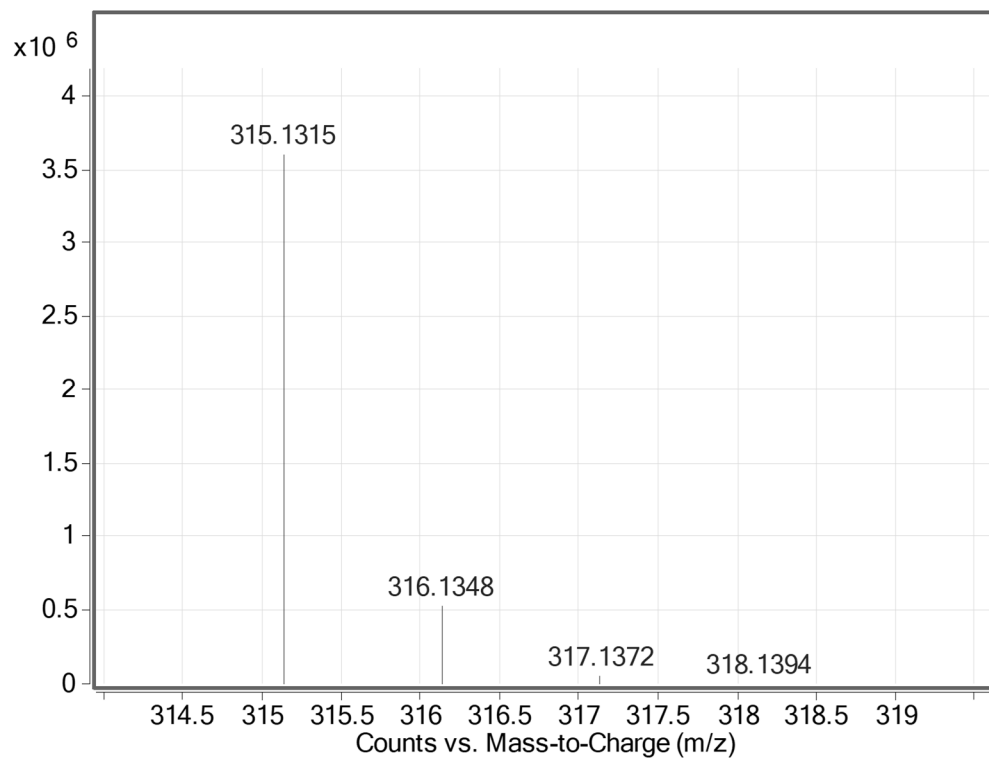

# 3-((2-methylphenyl)sulfonamido)-*N*-(4-(trifluoromethyl)phenyl)propanamide (7)

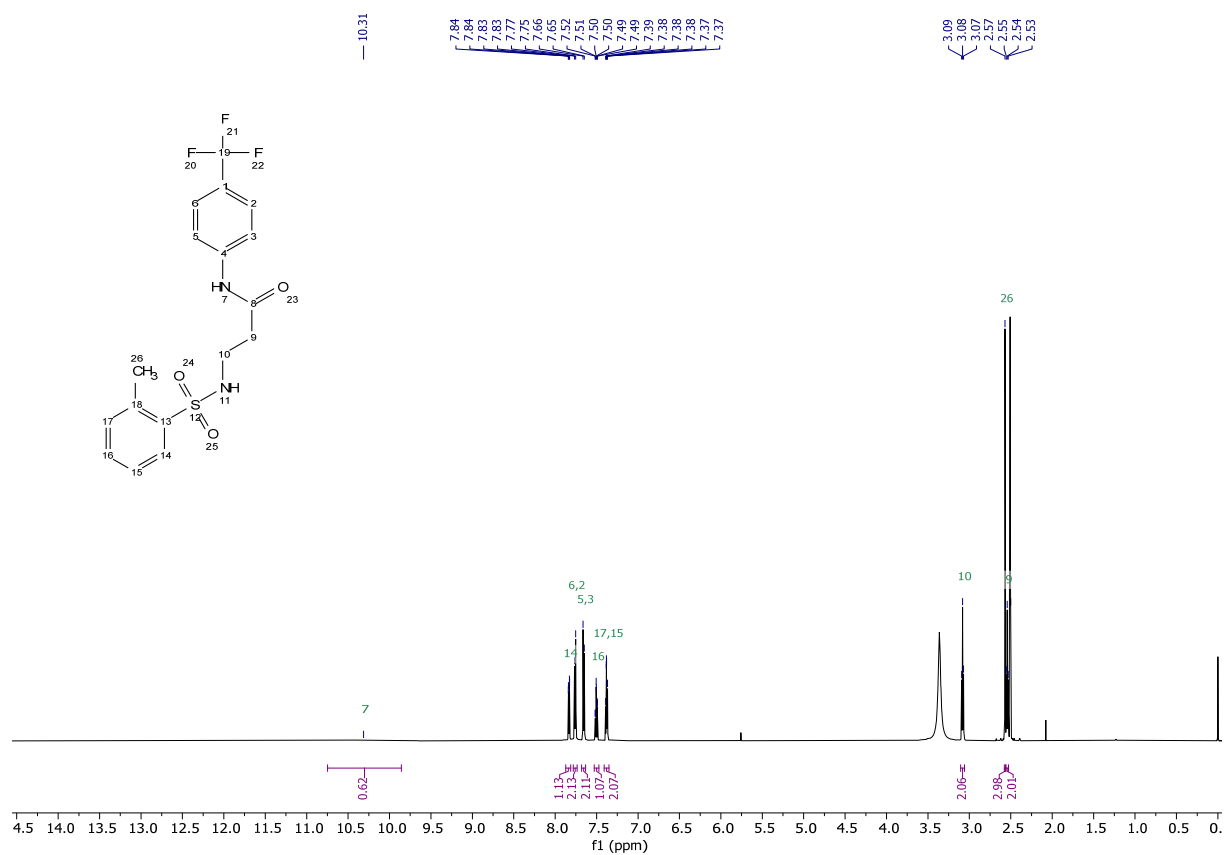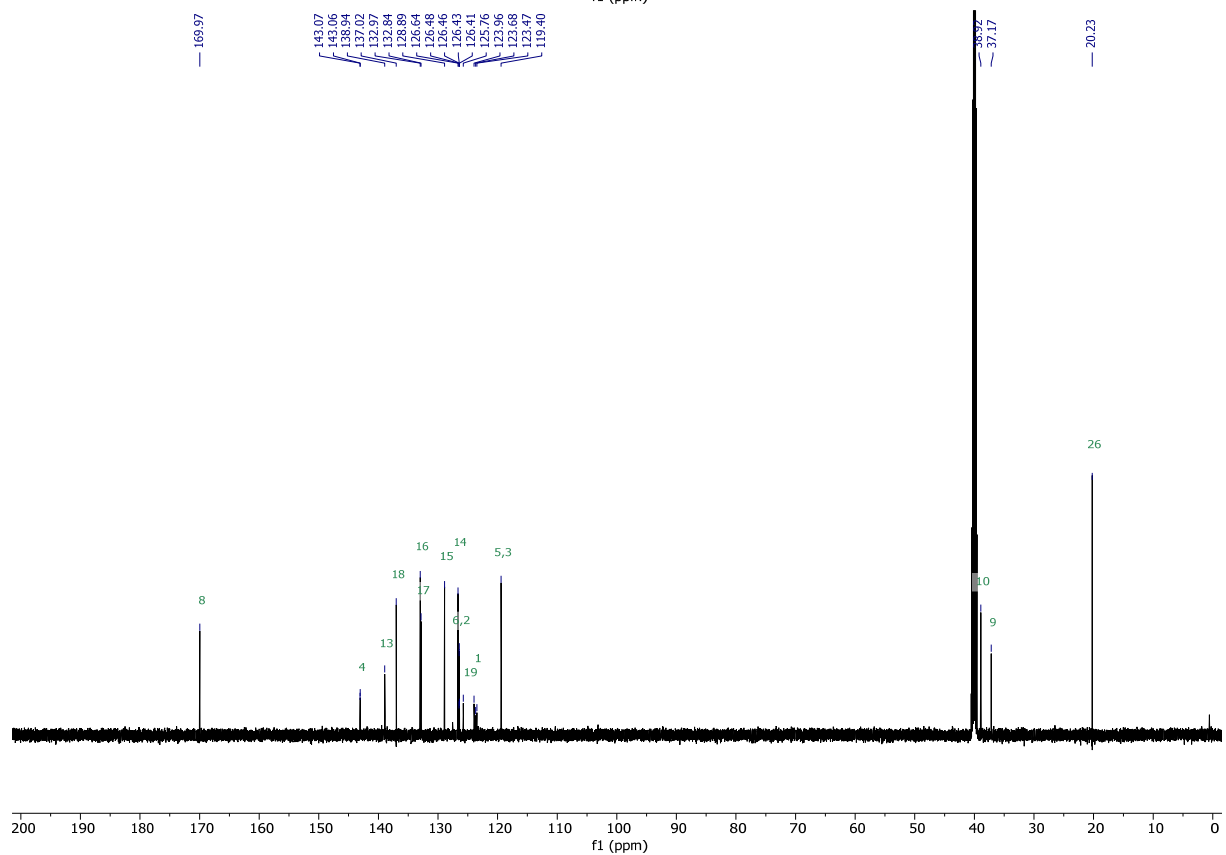

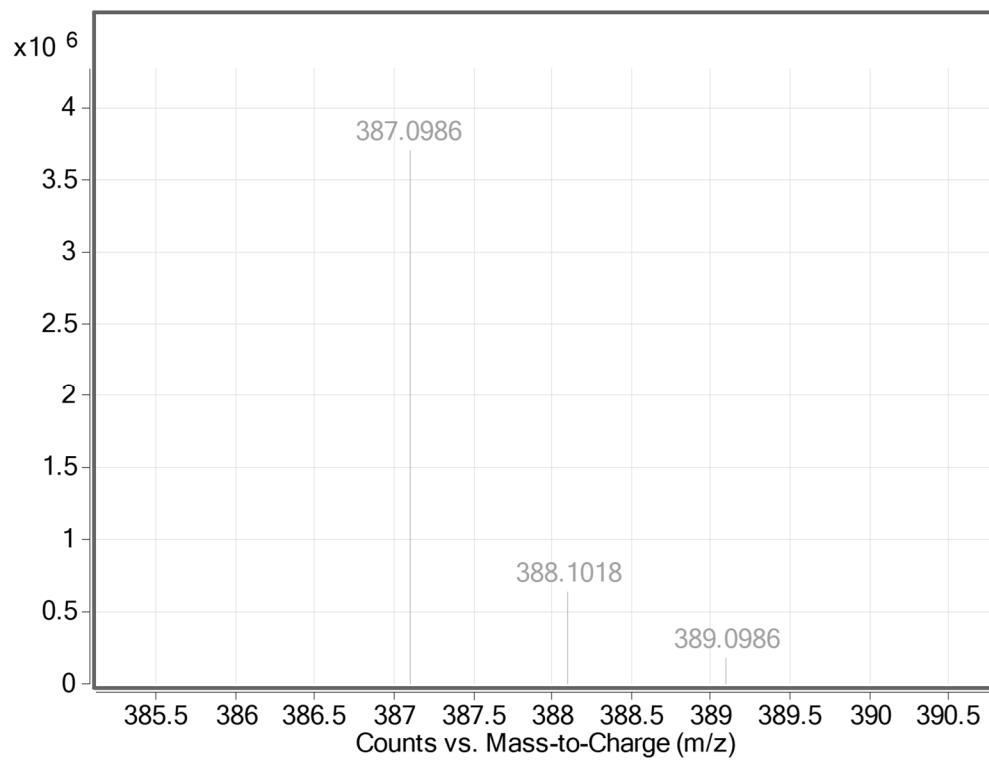

### 3-((4-methylphenyl)sulfonamido)-*N*-(4-(trifluoromethyl)phenyl)propanamide (8)

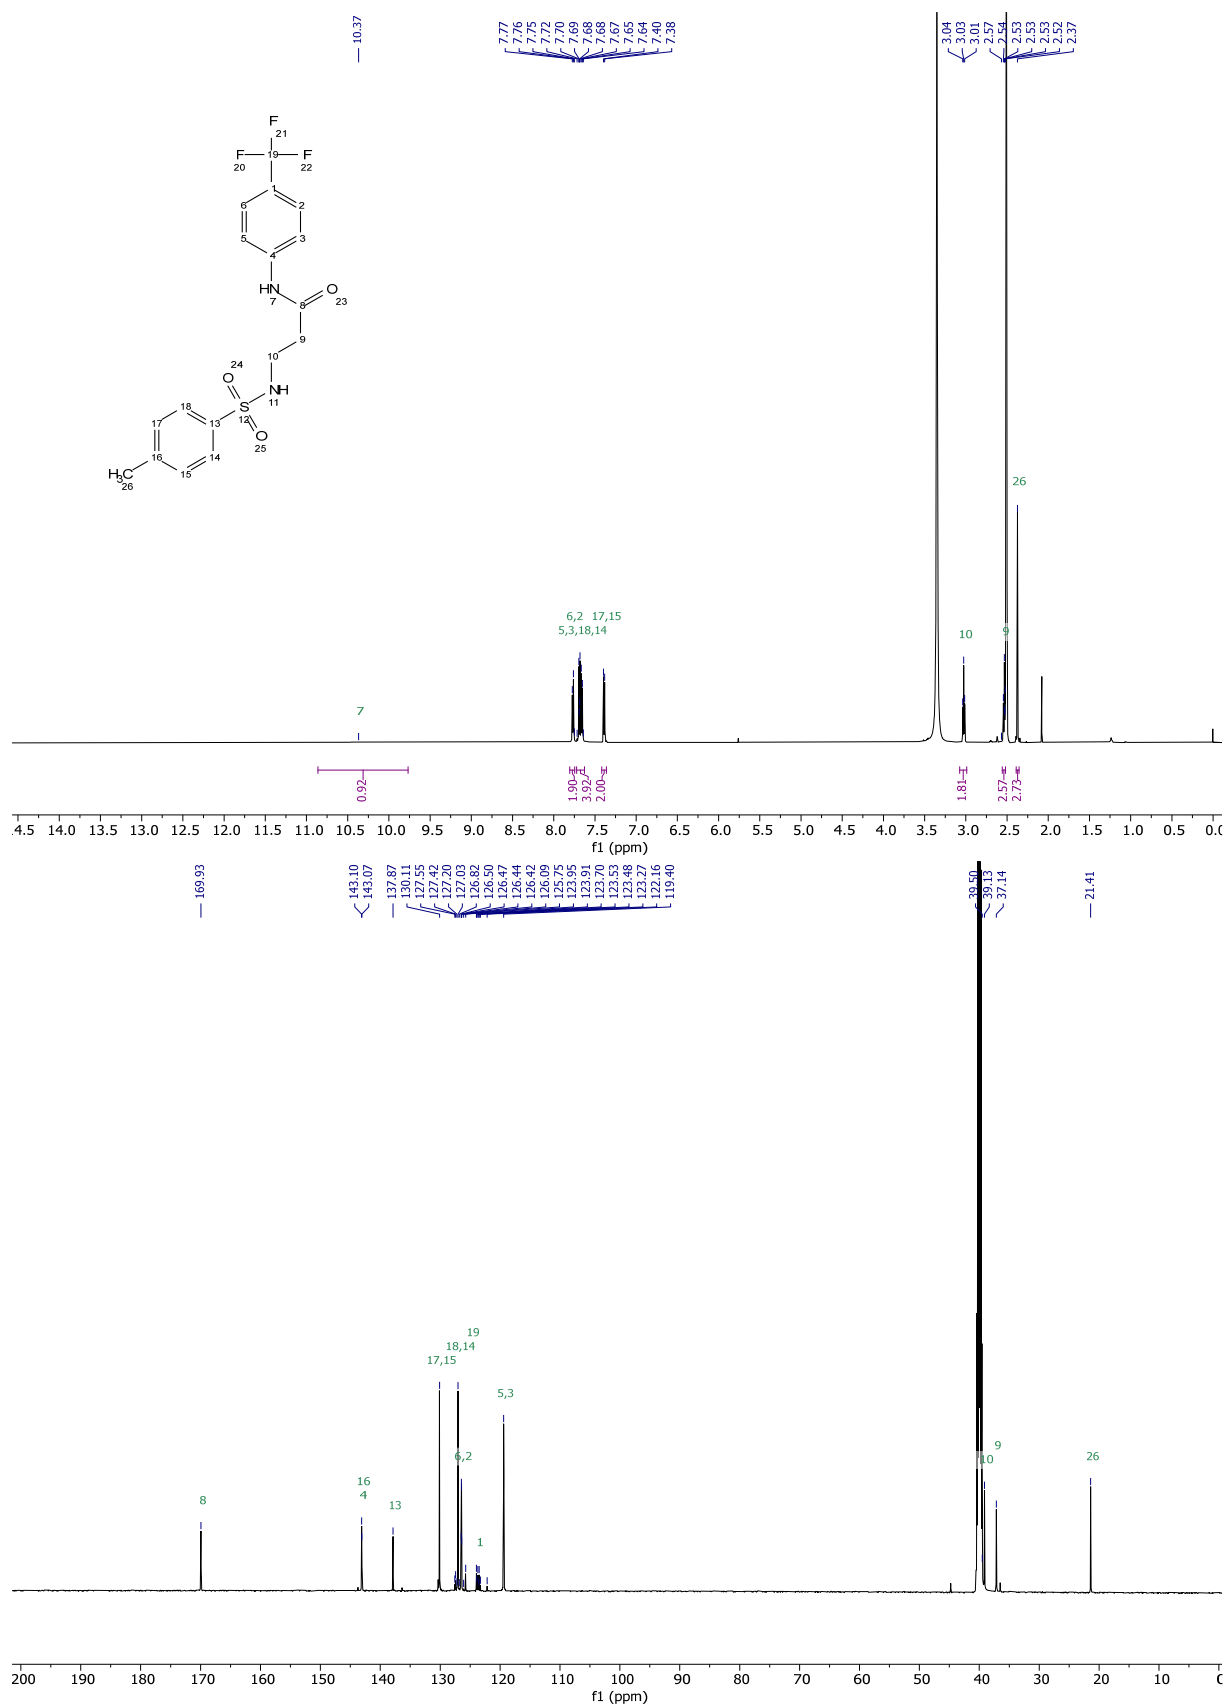

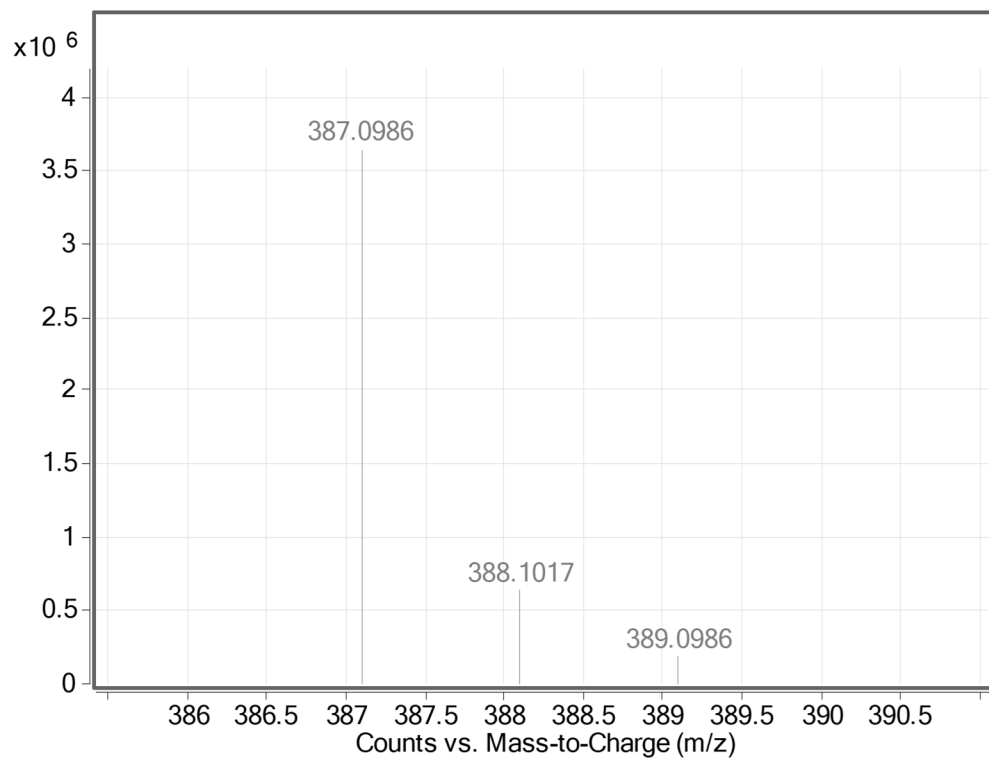

**2-(3-oxo-2,3-dihydro-4*H*-benzo[*b*][1,4]thiazin-4-yl)-*N*-(4-(trifluoromethyl)phenyl)acetamide (9)**

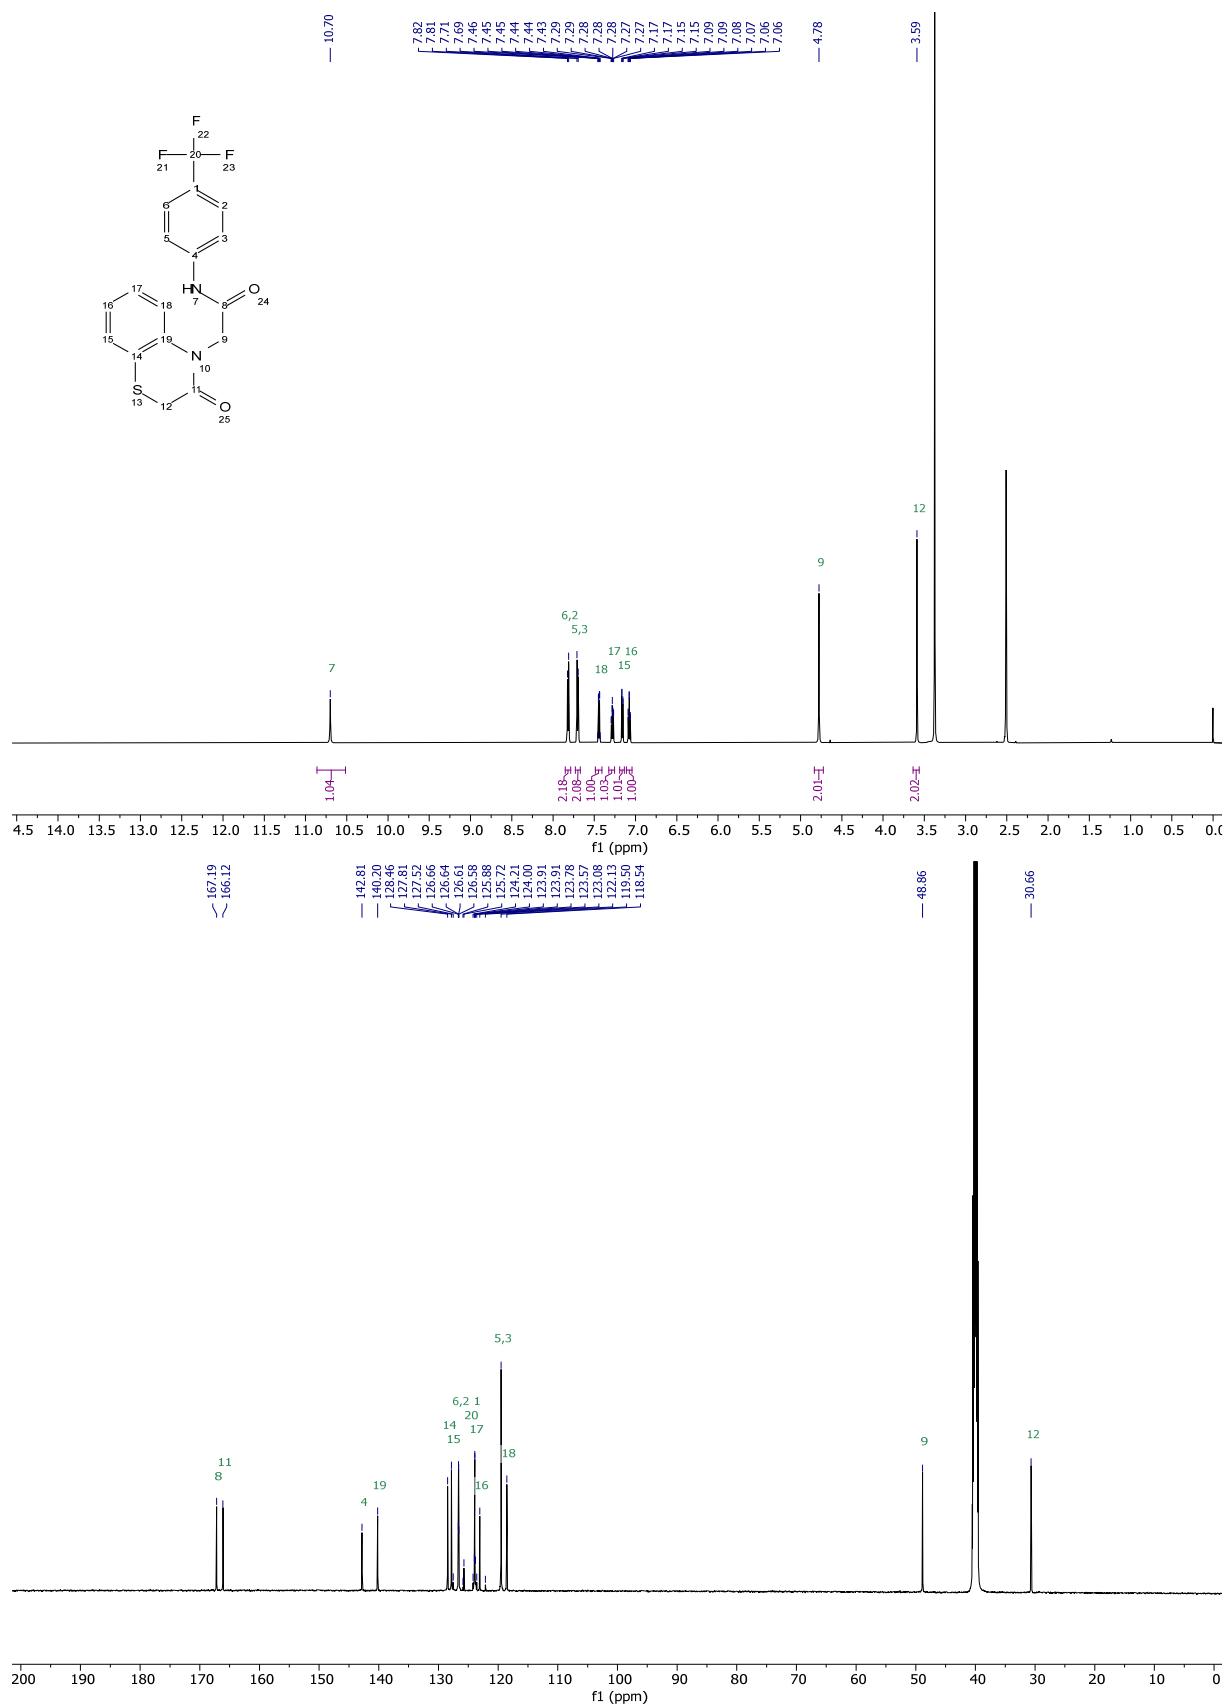

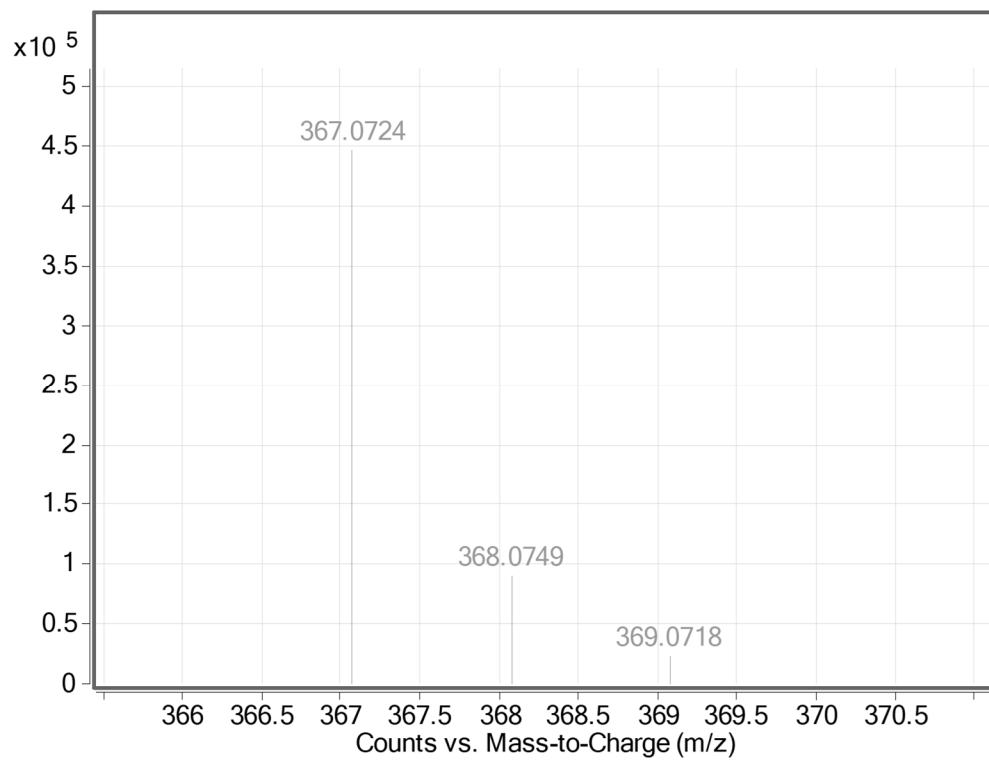



### 3-(3-oxo-2,3-dihydro-4*H*-benzo[*b*][1,4]thiazin-4-yl)-*N*-phenylpropanamide (10)

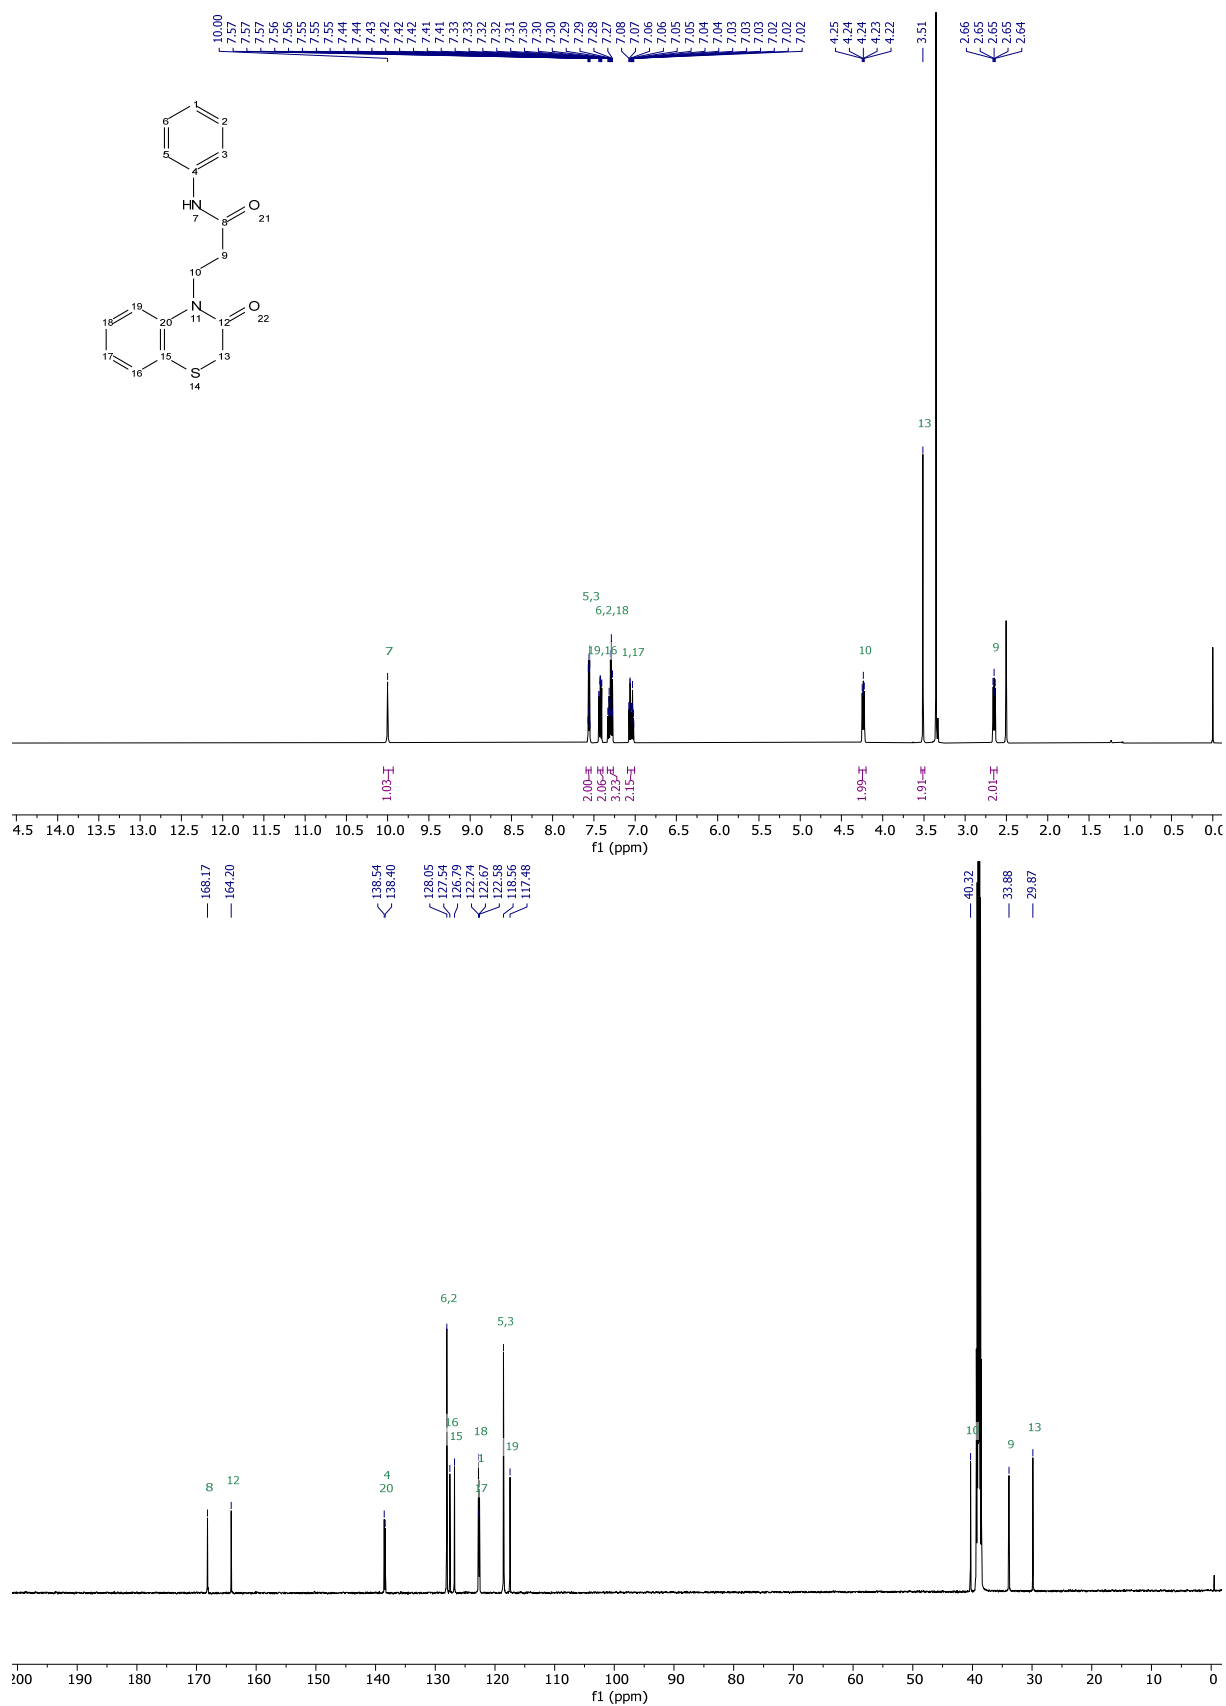

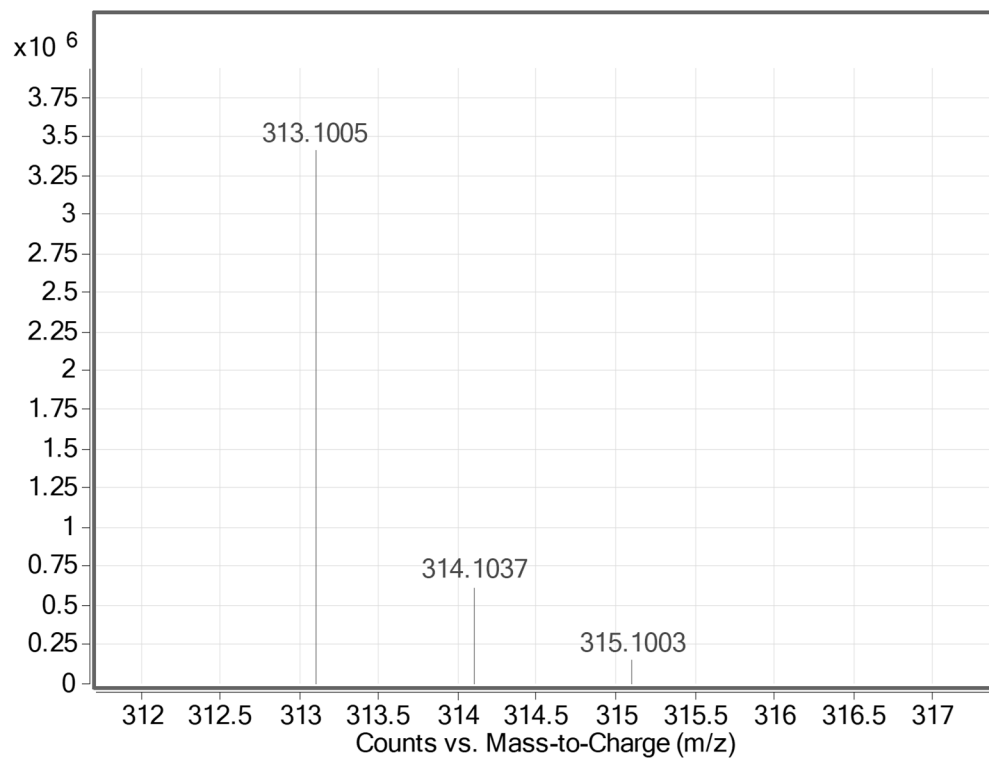

**3-(3-oxo-2,3-dihydro-4*H*-benzo[*b*][1,4]thiazin-4-yl)-*N*-(2-(trifluoromethyl)phenyl)propanamide (11)**

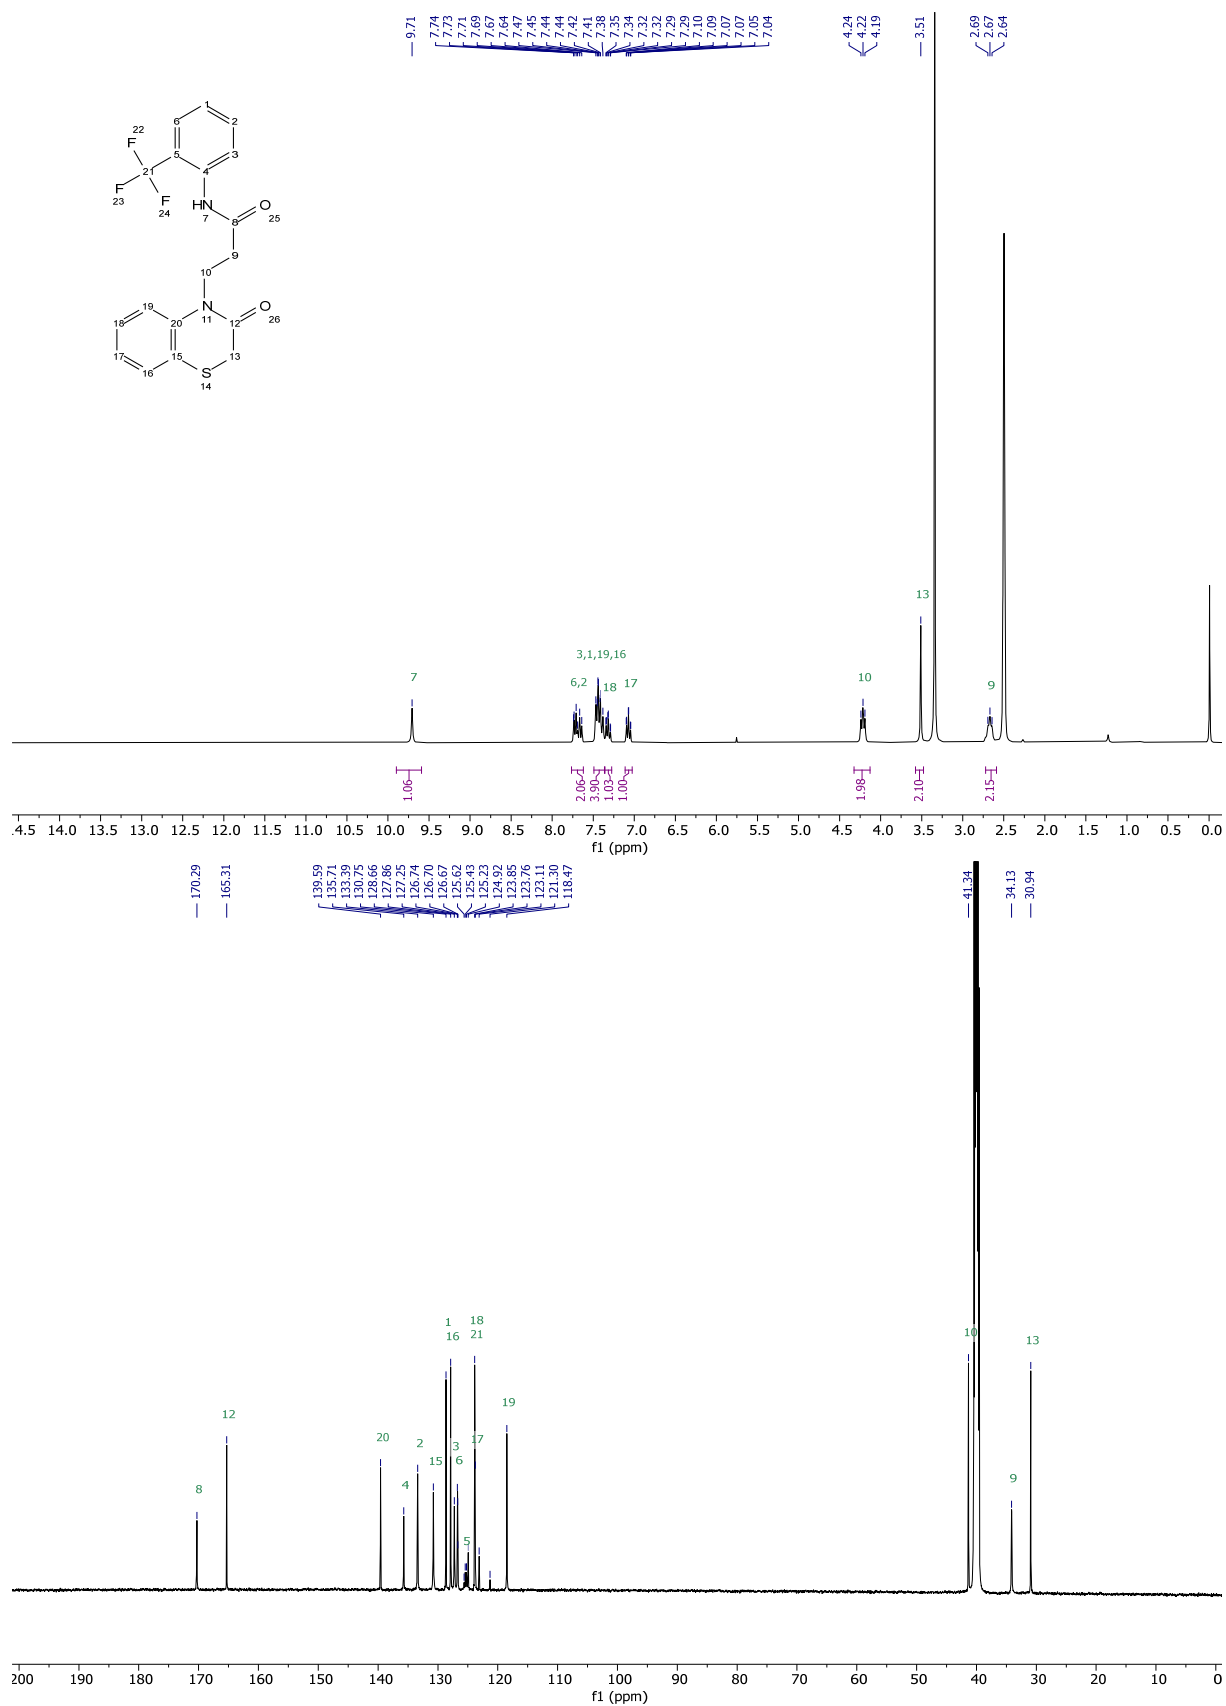

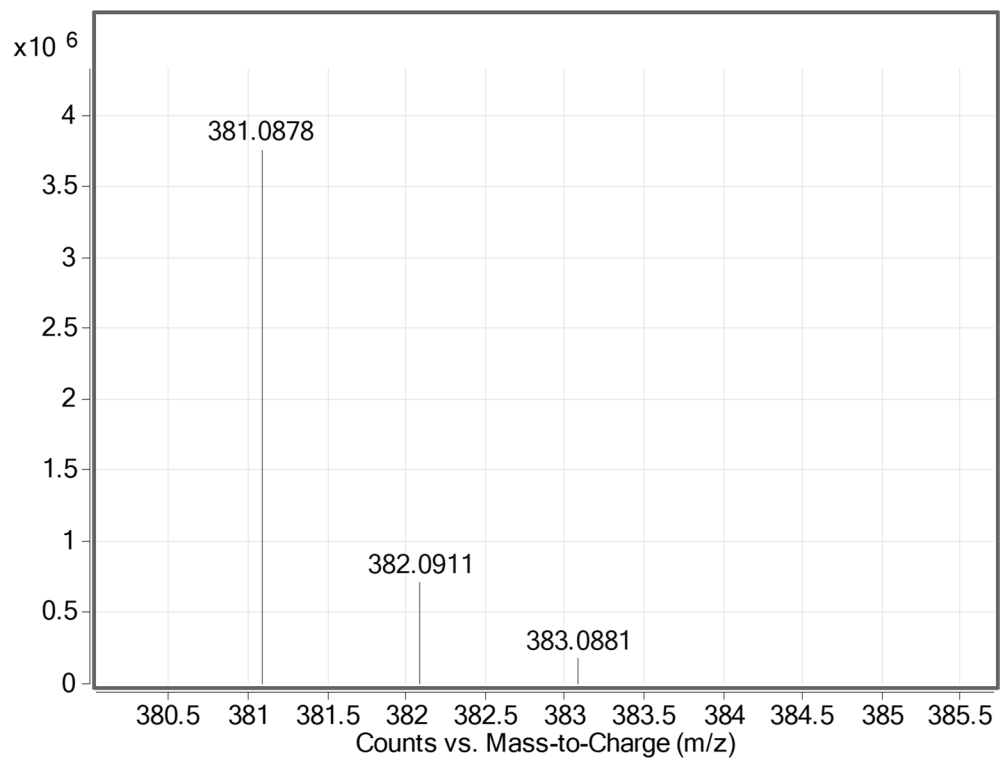

### 3-(3-oxo-2,3-dihydro-4*H*-benzo[*b*][1,4]thiazin-4-yl)-*N*-(*o*-tolyl)propanamide (12)

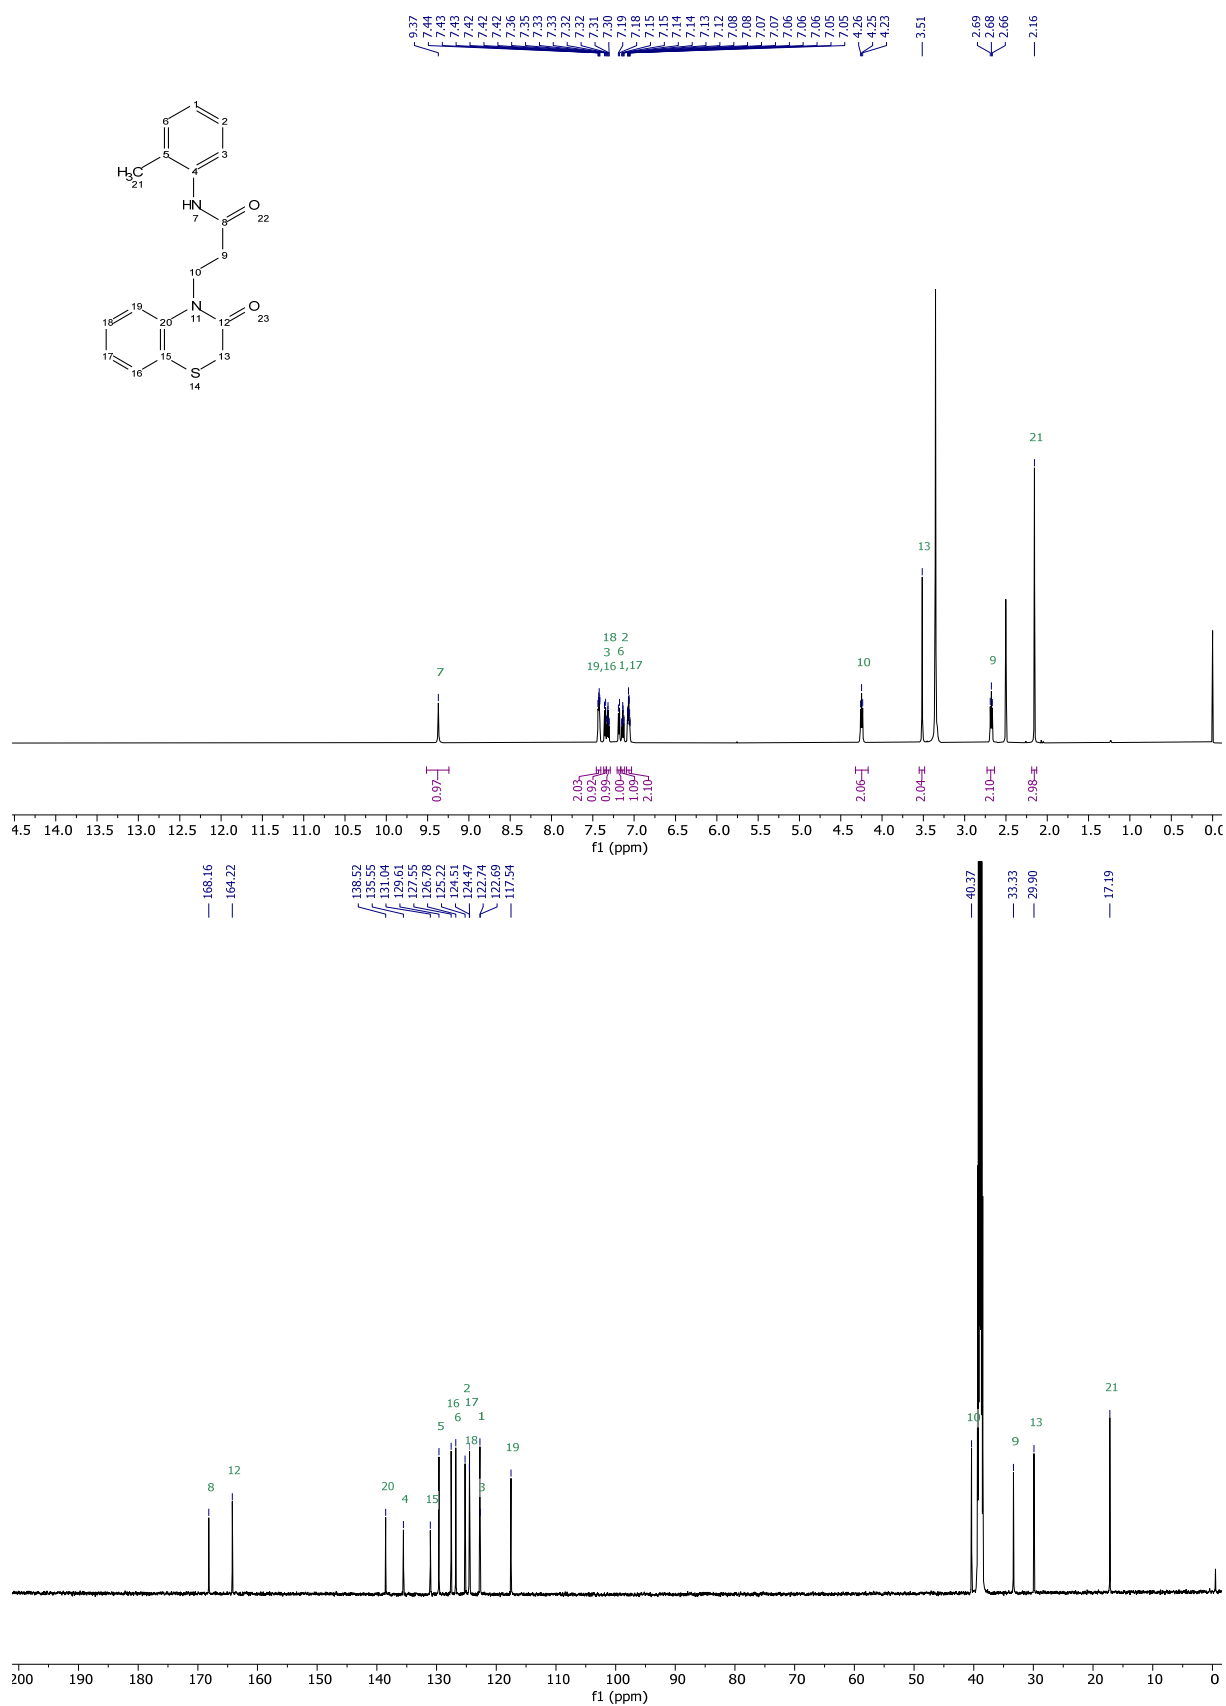

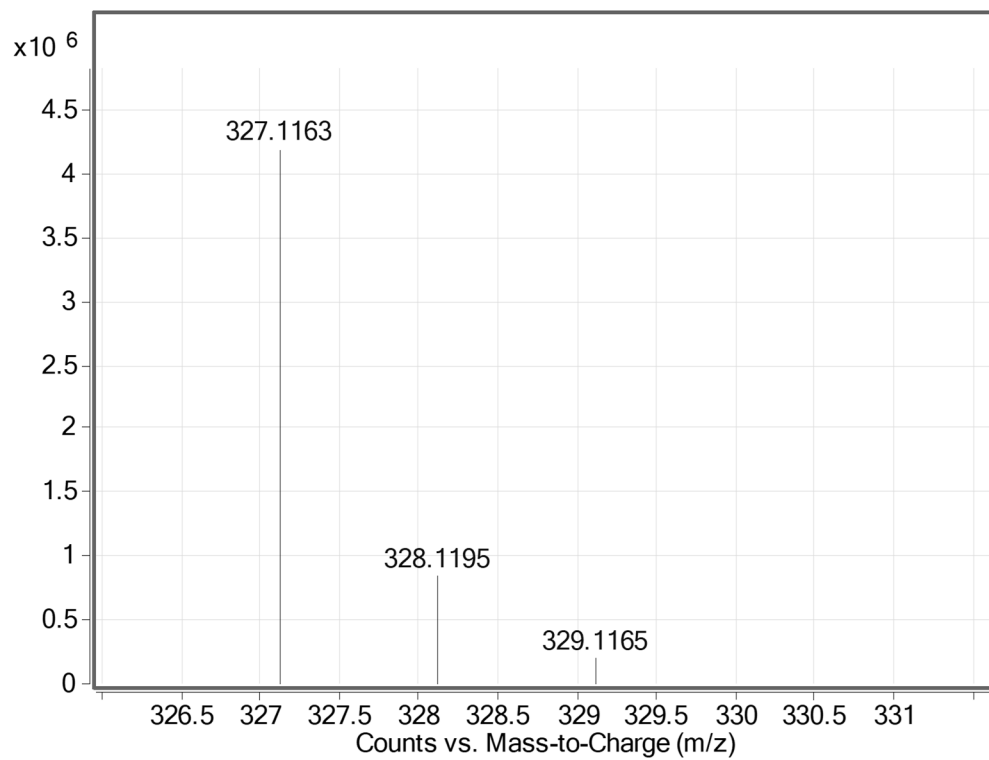

**3-(3-oxo-2,3-dihydro-4*H*-benzo[*b*][1,4]thiazin-4-yl)-*N*-(*m*-tolyl)propanamide (13)**

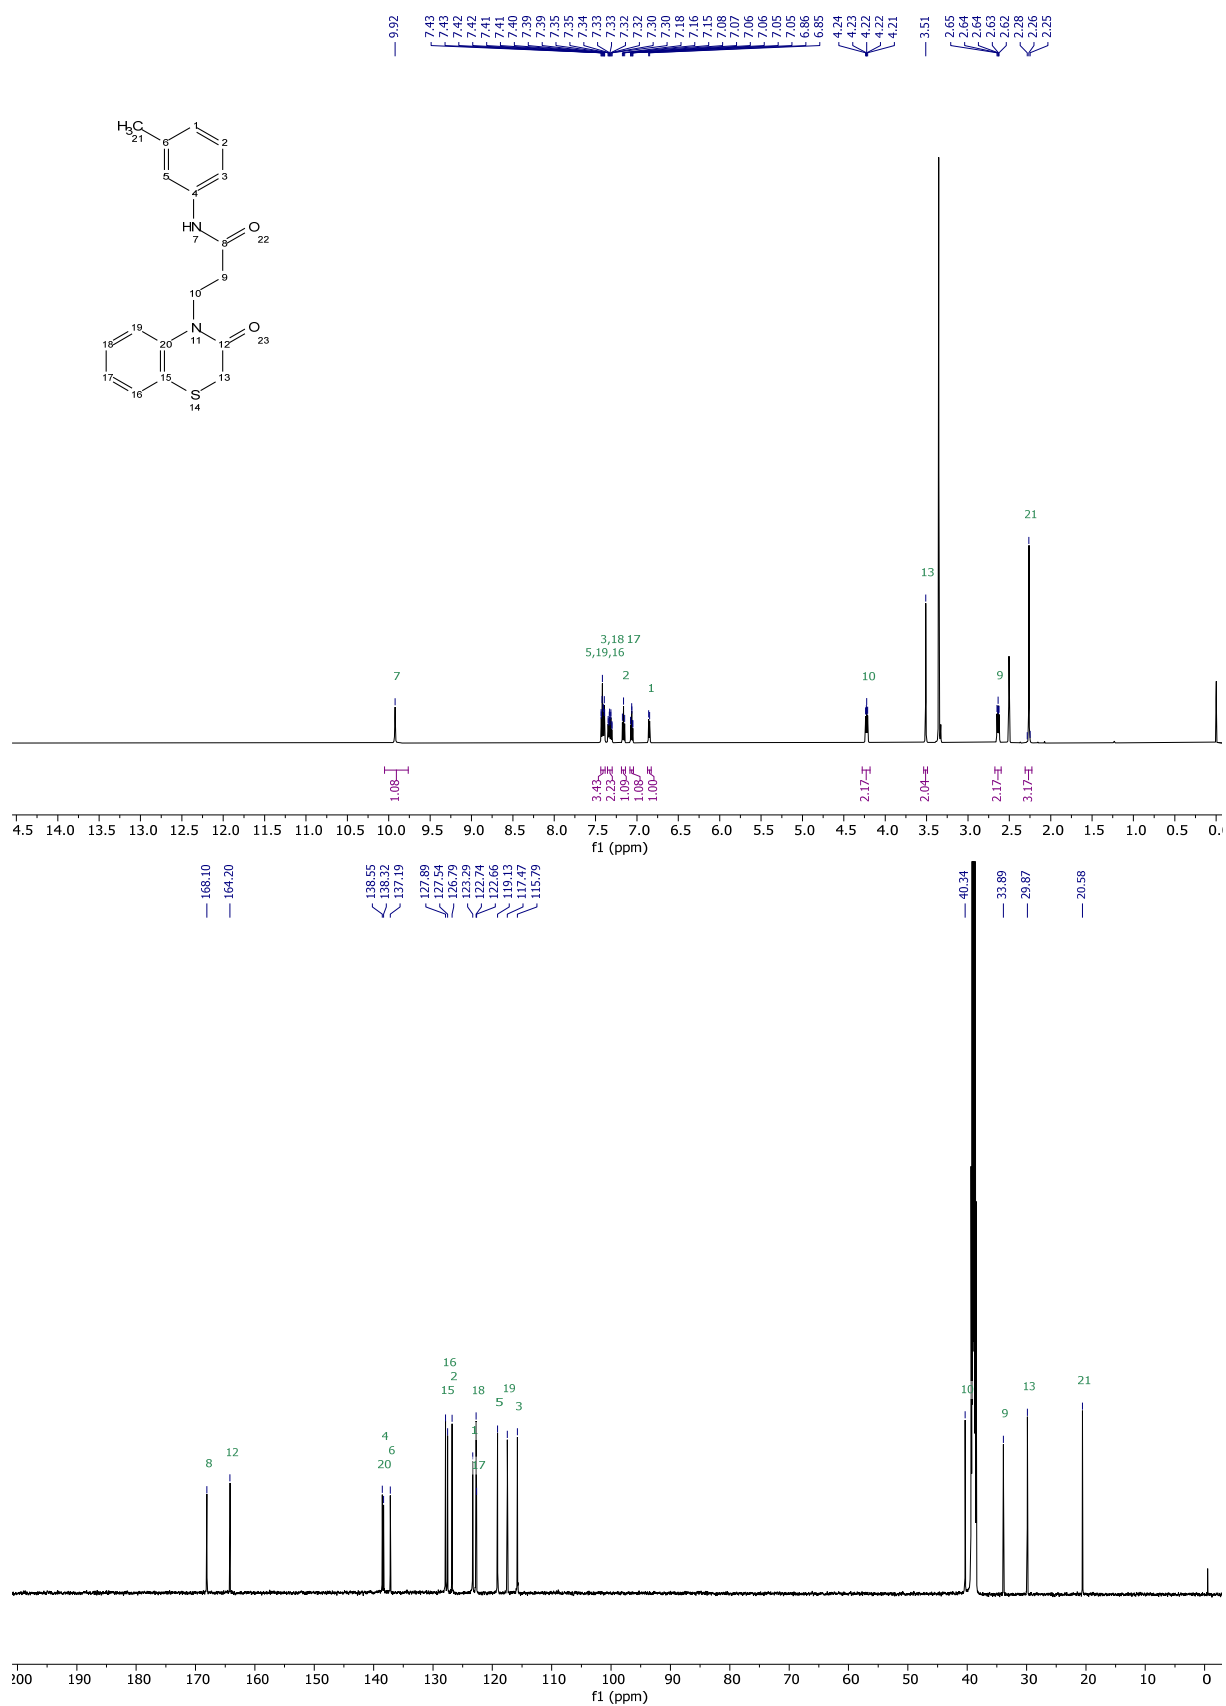

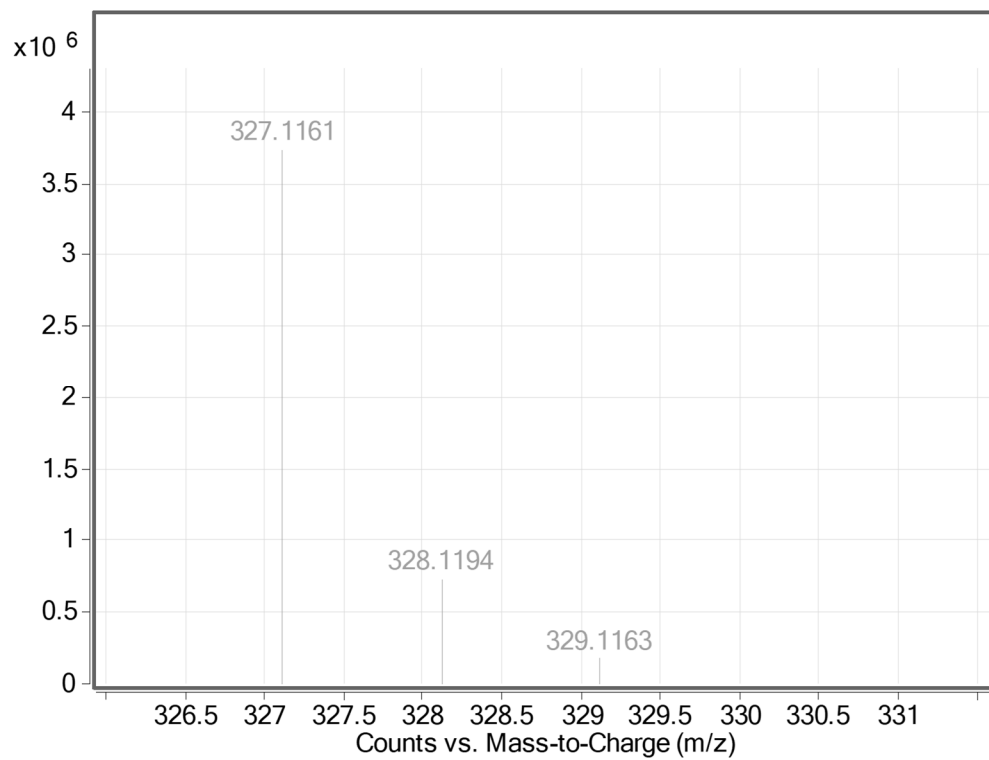



**3-(3-oxo-2,3-dihydro-4*H*-benzo[*b*][1,4]thiazin-4-yl)-*N*-(*p*-tolyl)propanamide (14)**

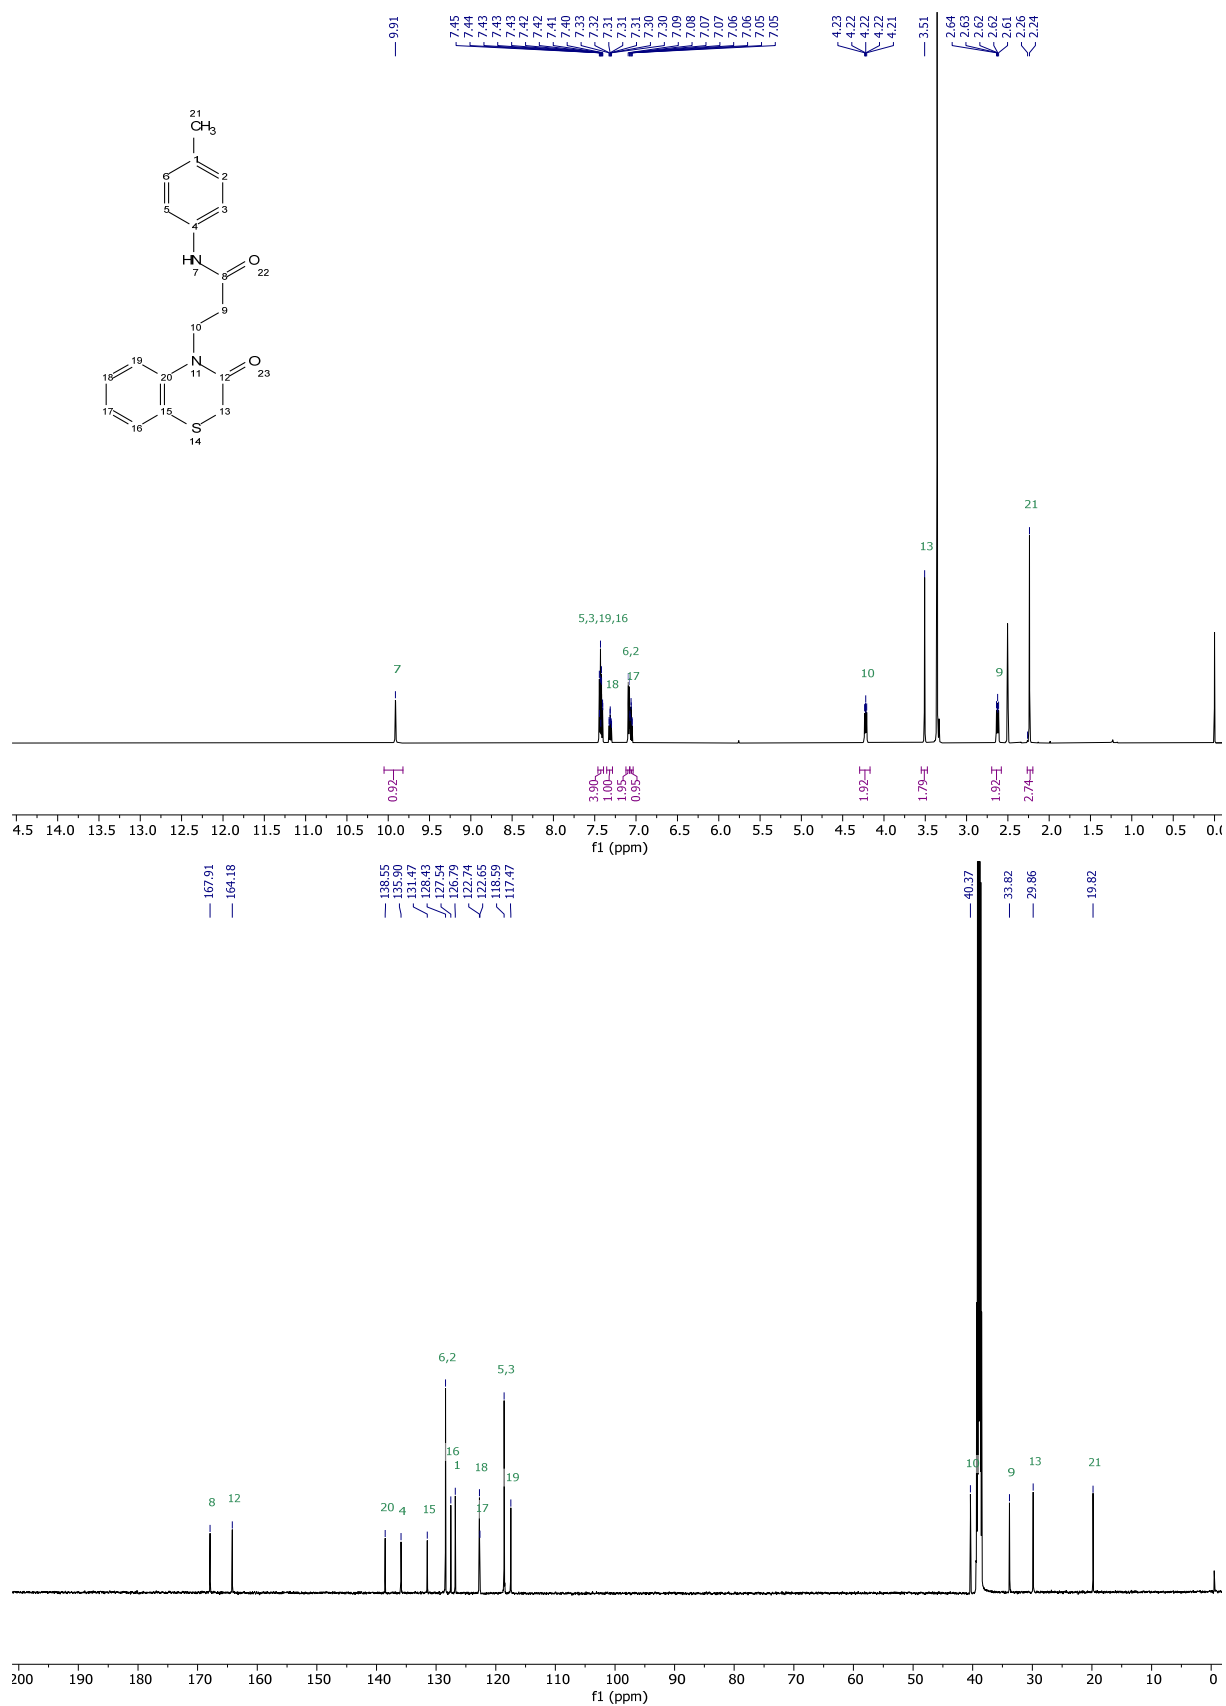

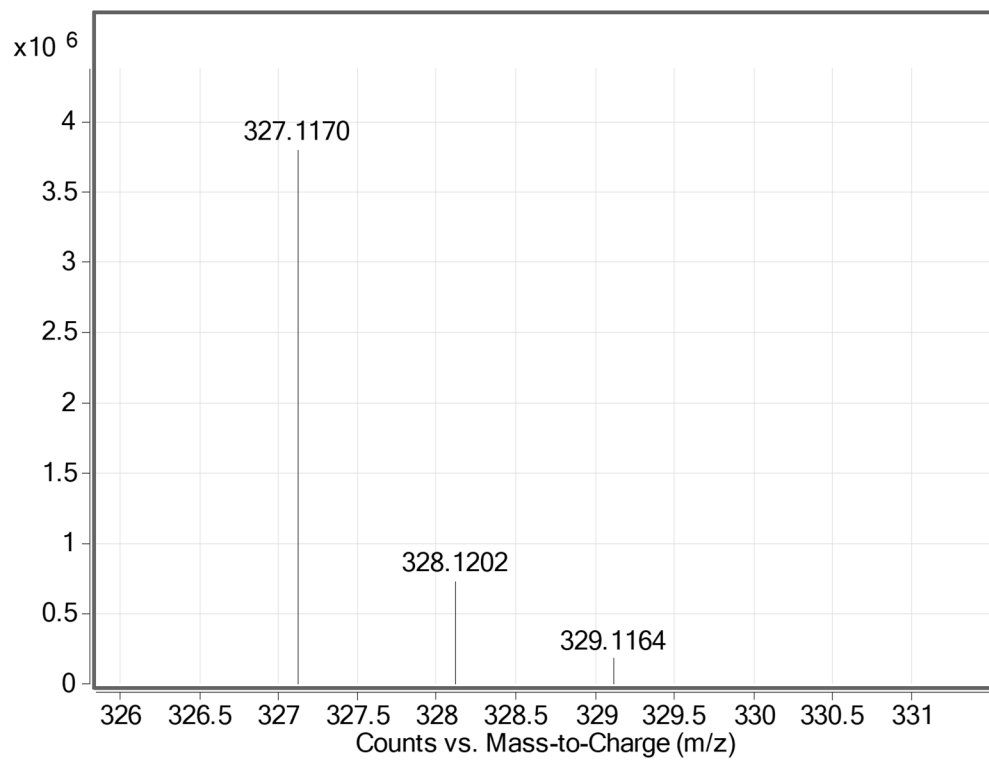

***N*-(2-chlorophenyl)-3-(3-oxo-2,3-dihydro-4*H*-benzo[*b*][1,4]thiazin-4-yl)propanamide (15)**

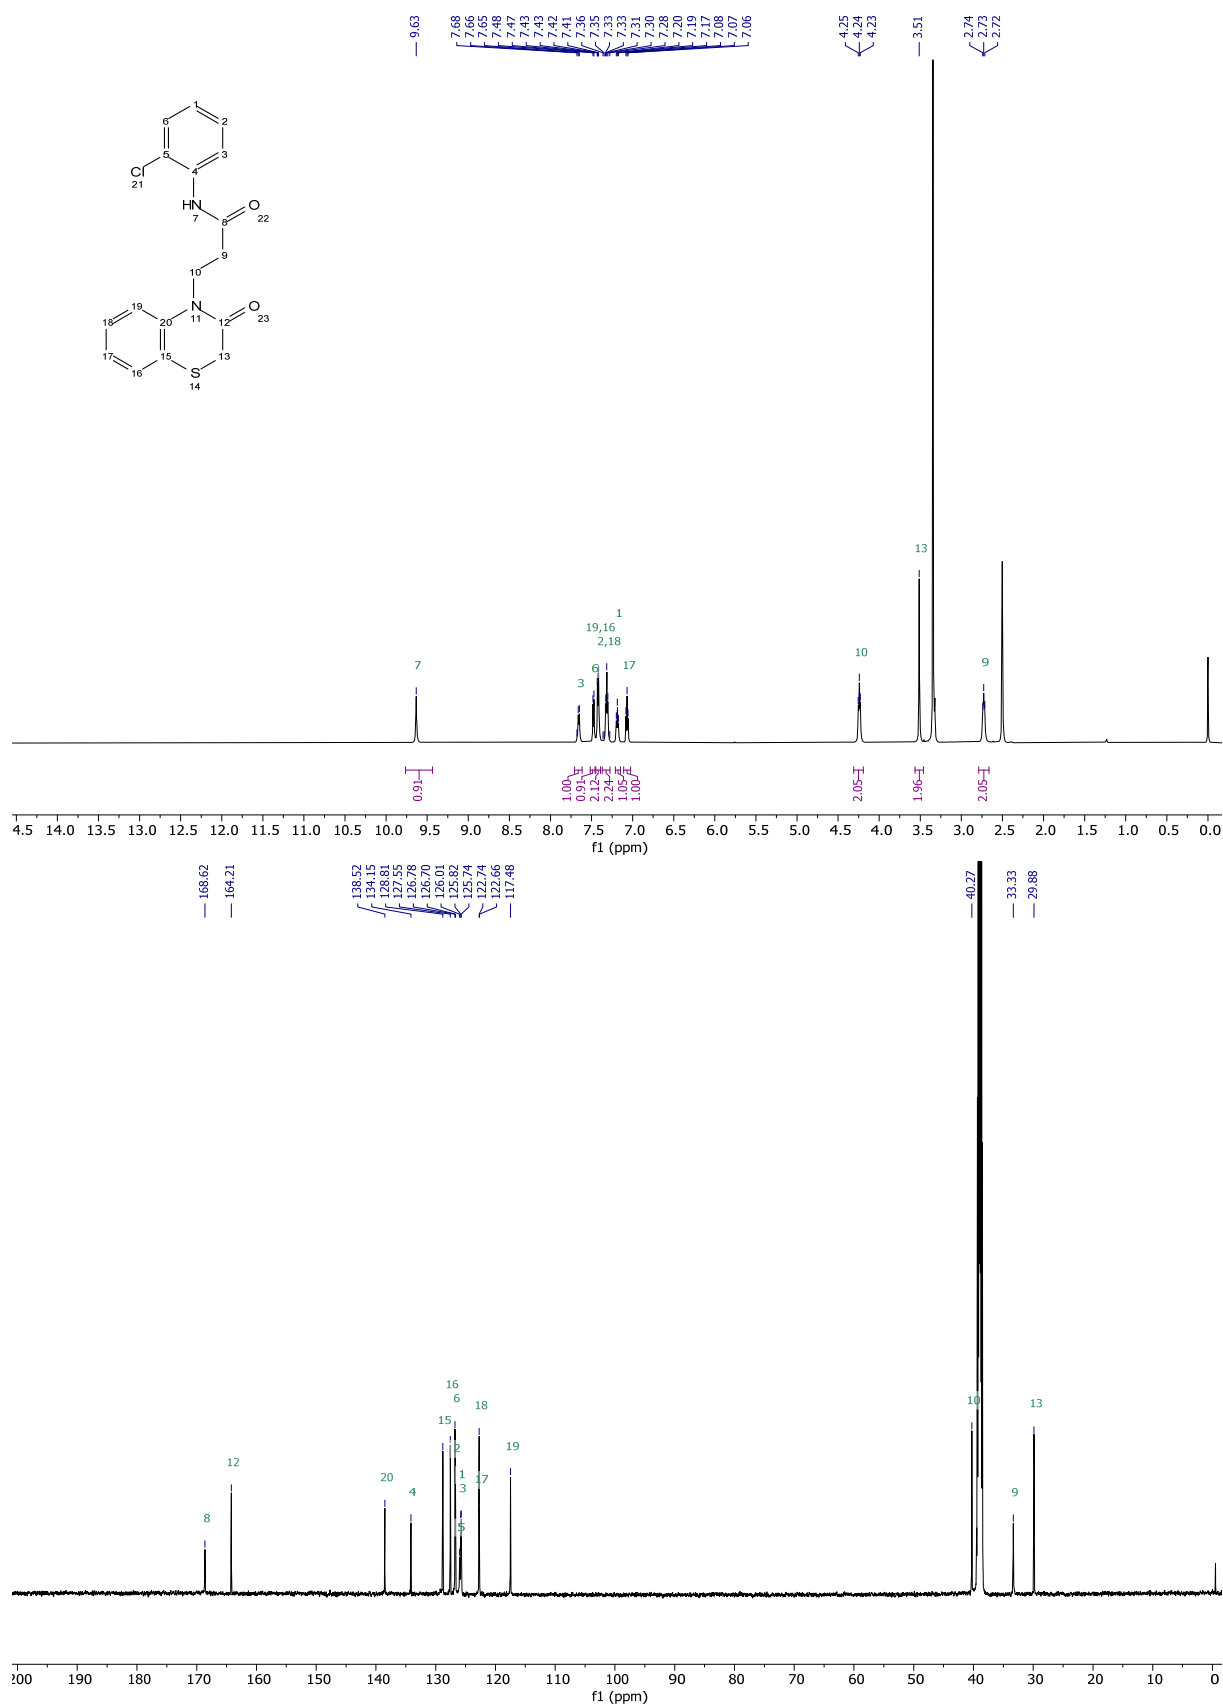

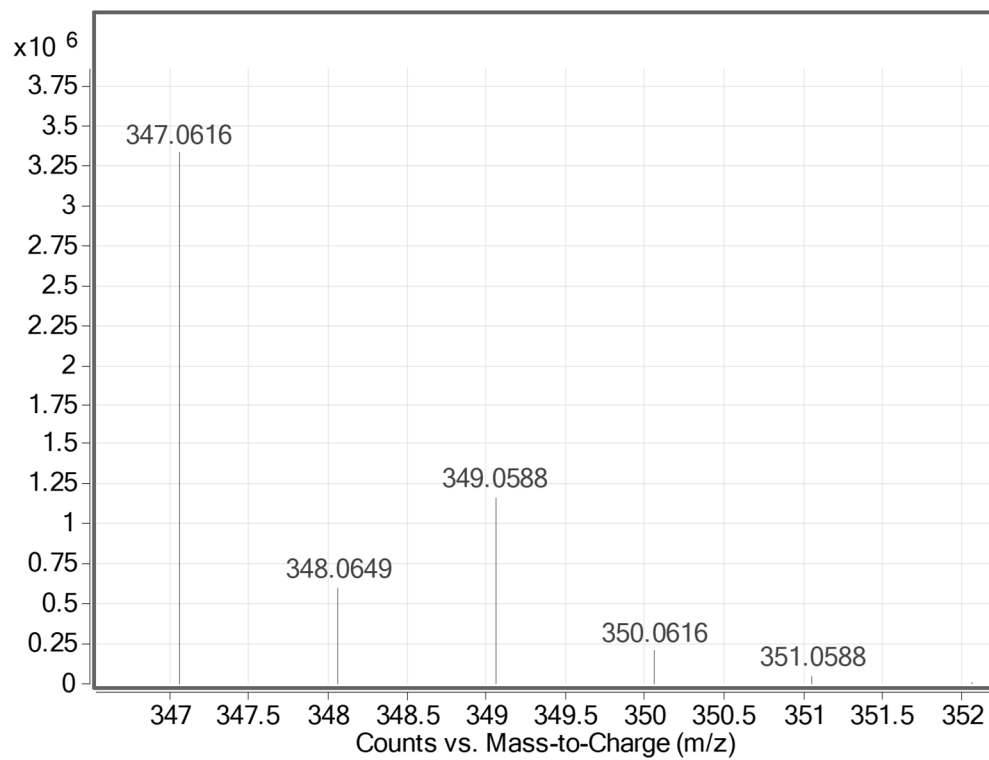

***N*-(3-chlorophenyl)-3-(3-oxo-2,3-dihydro-4*H*-benzo[*b*][1,4]thiazin-4-yl)propanamide (16)**

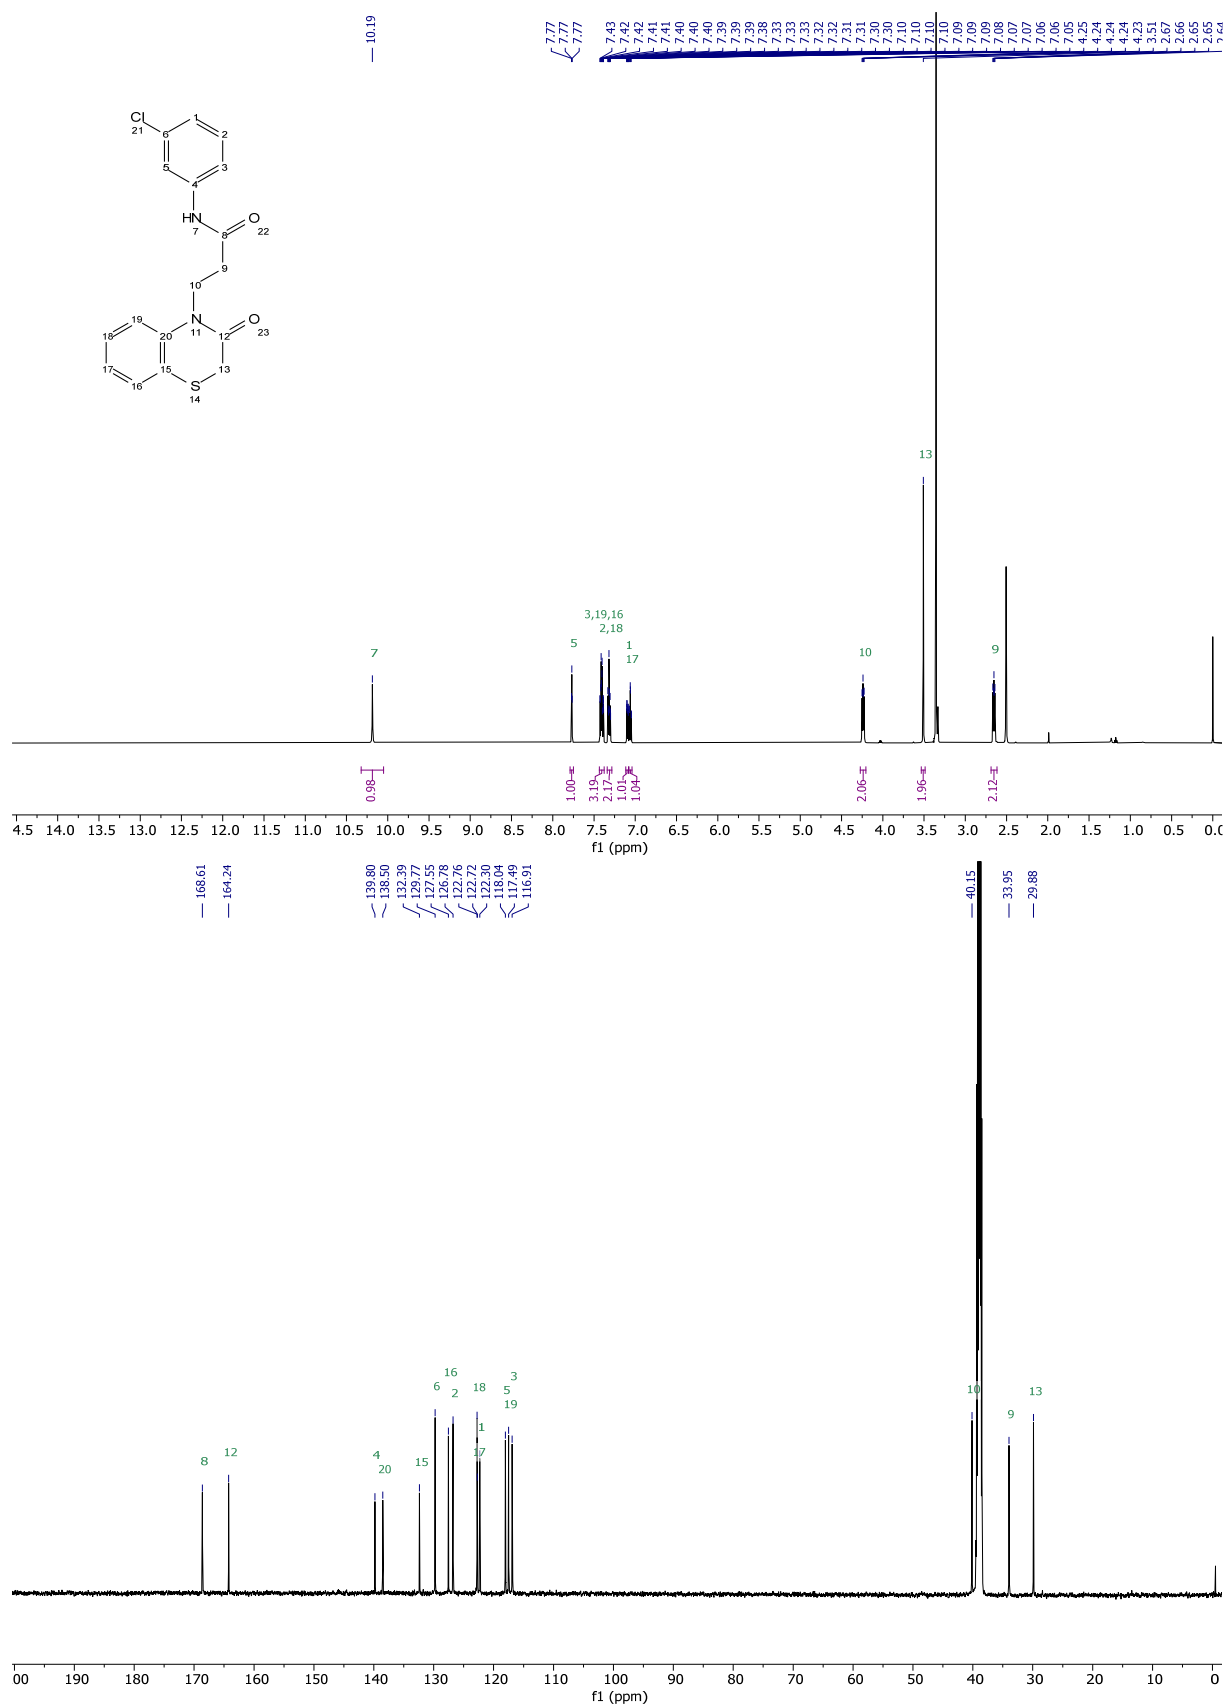

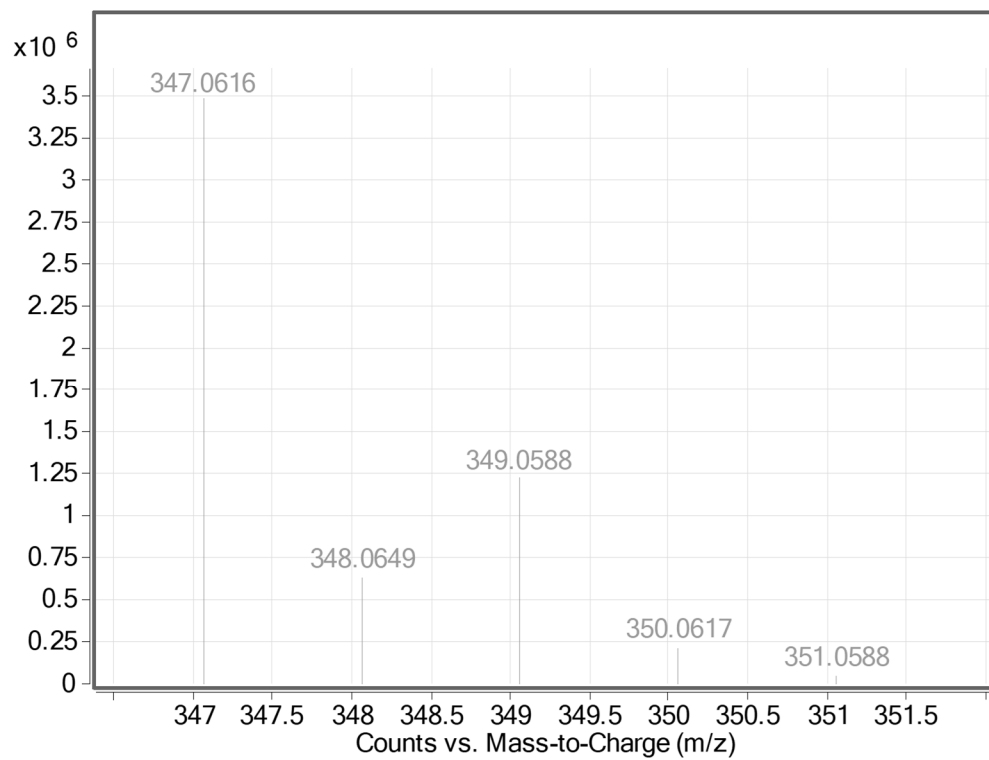

***N*-(4-chlorophenyl)-3-(3-oxo-2,3-dihydro-4*H*-benzo[*b*][1,4]thiazin-4-yl)propanamide (17)**

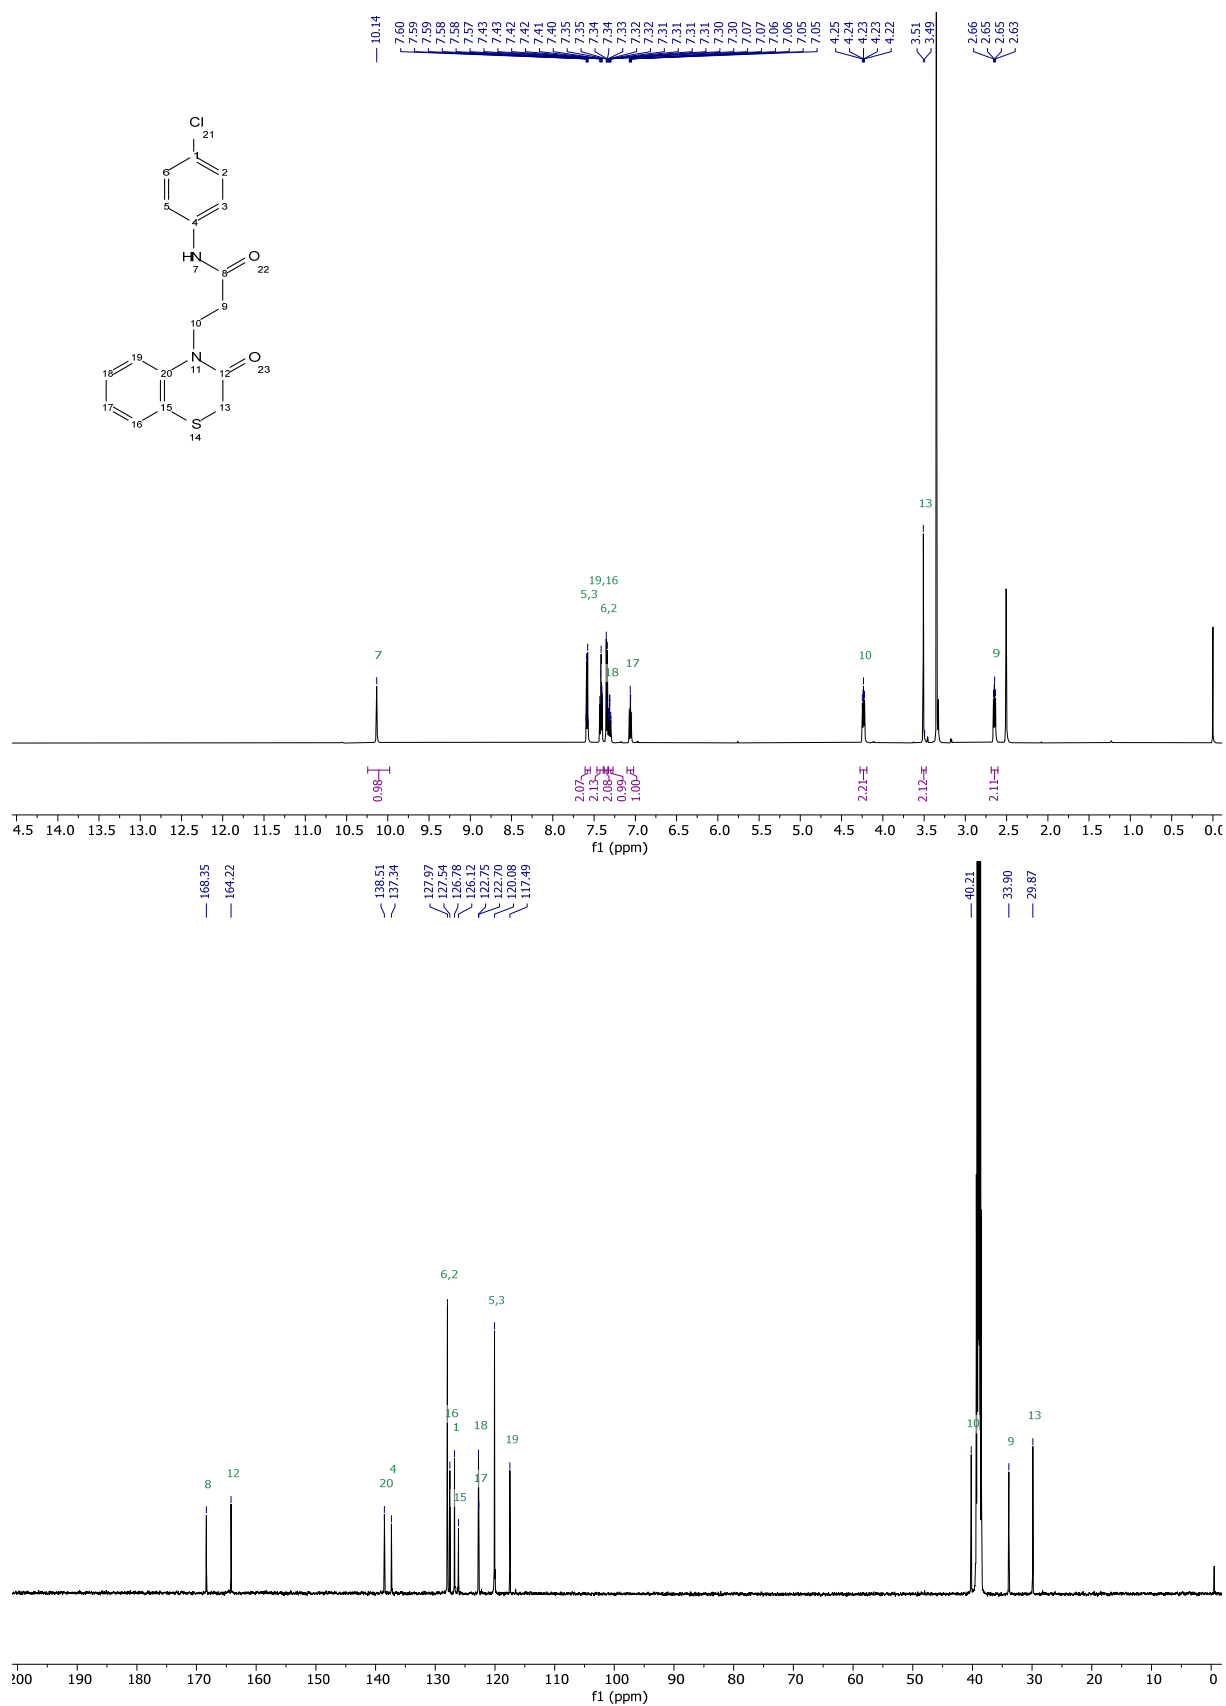

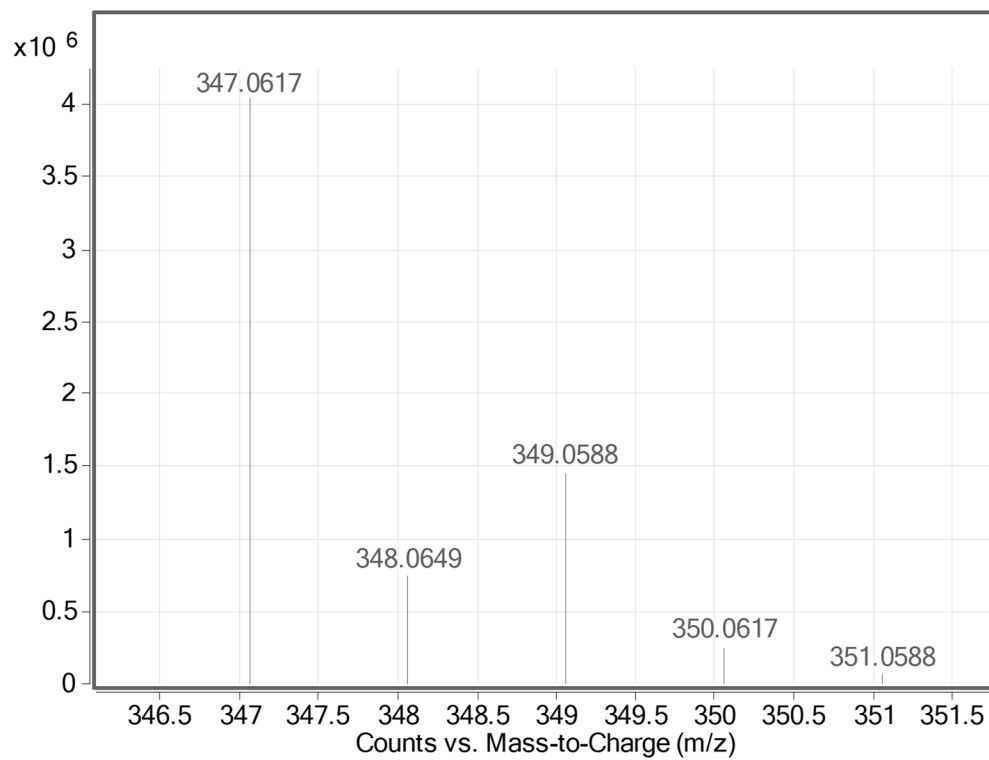



***N*-(2-methoxyphenyl)-3-(3-oxo-2,3-dihydro-4*H*-benzo[*b*][1,4]thiazin-4-yl)propanamide (18)**

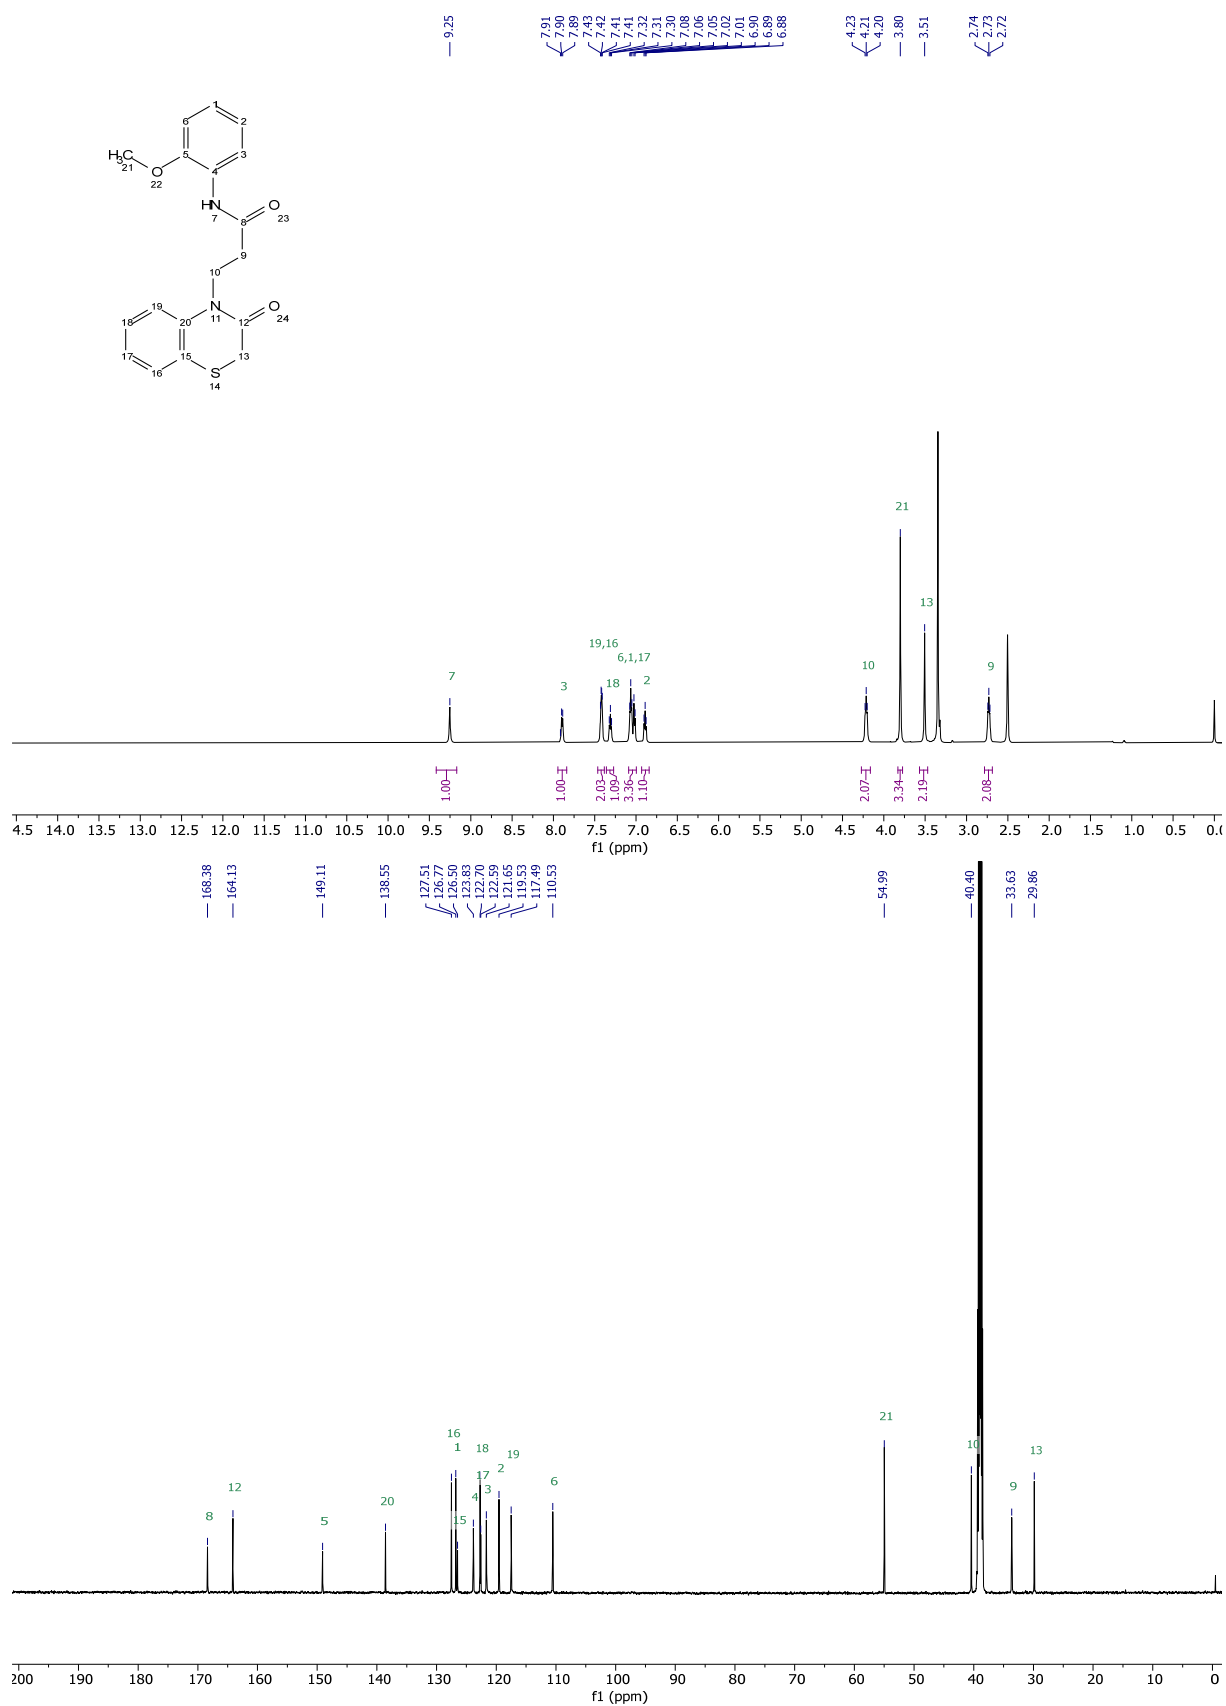

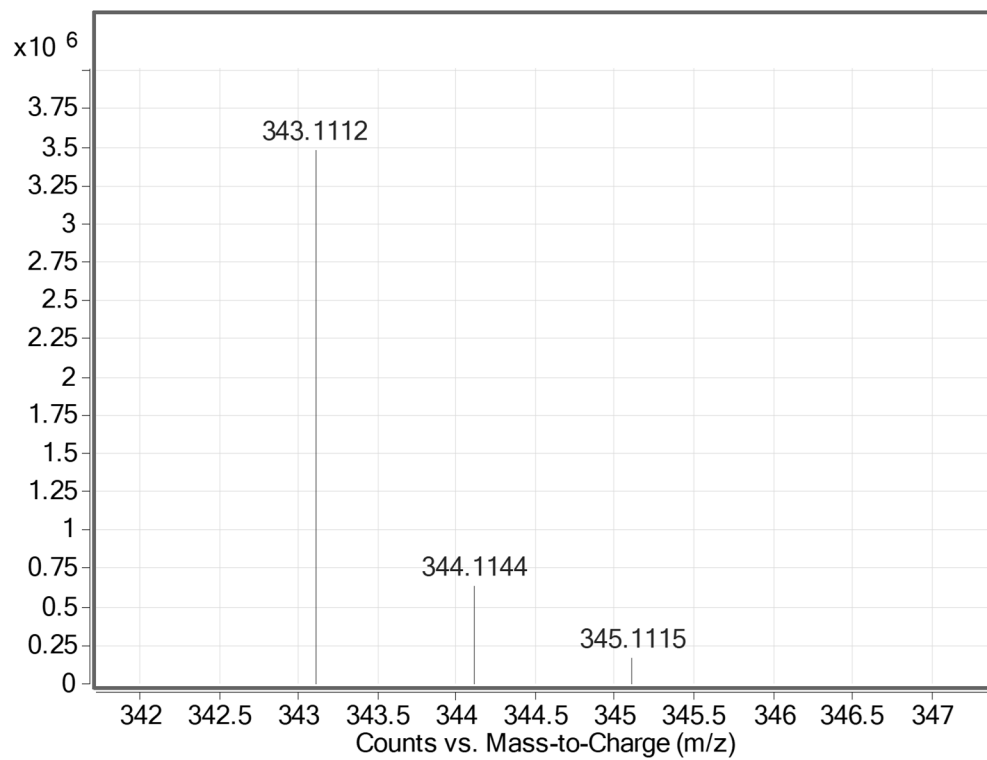

***N*-(3-methoxyphenyl)-3-(3-oxo-2,3-dihydro-4*H*-benzo[*b*][1,4]thiazin-4-yl)propanamide (19)**

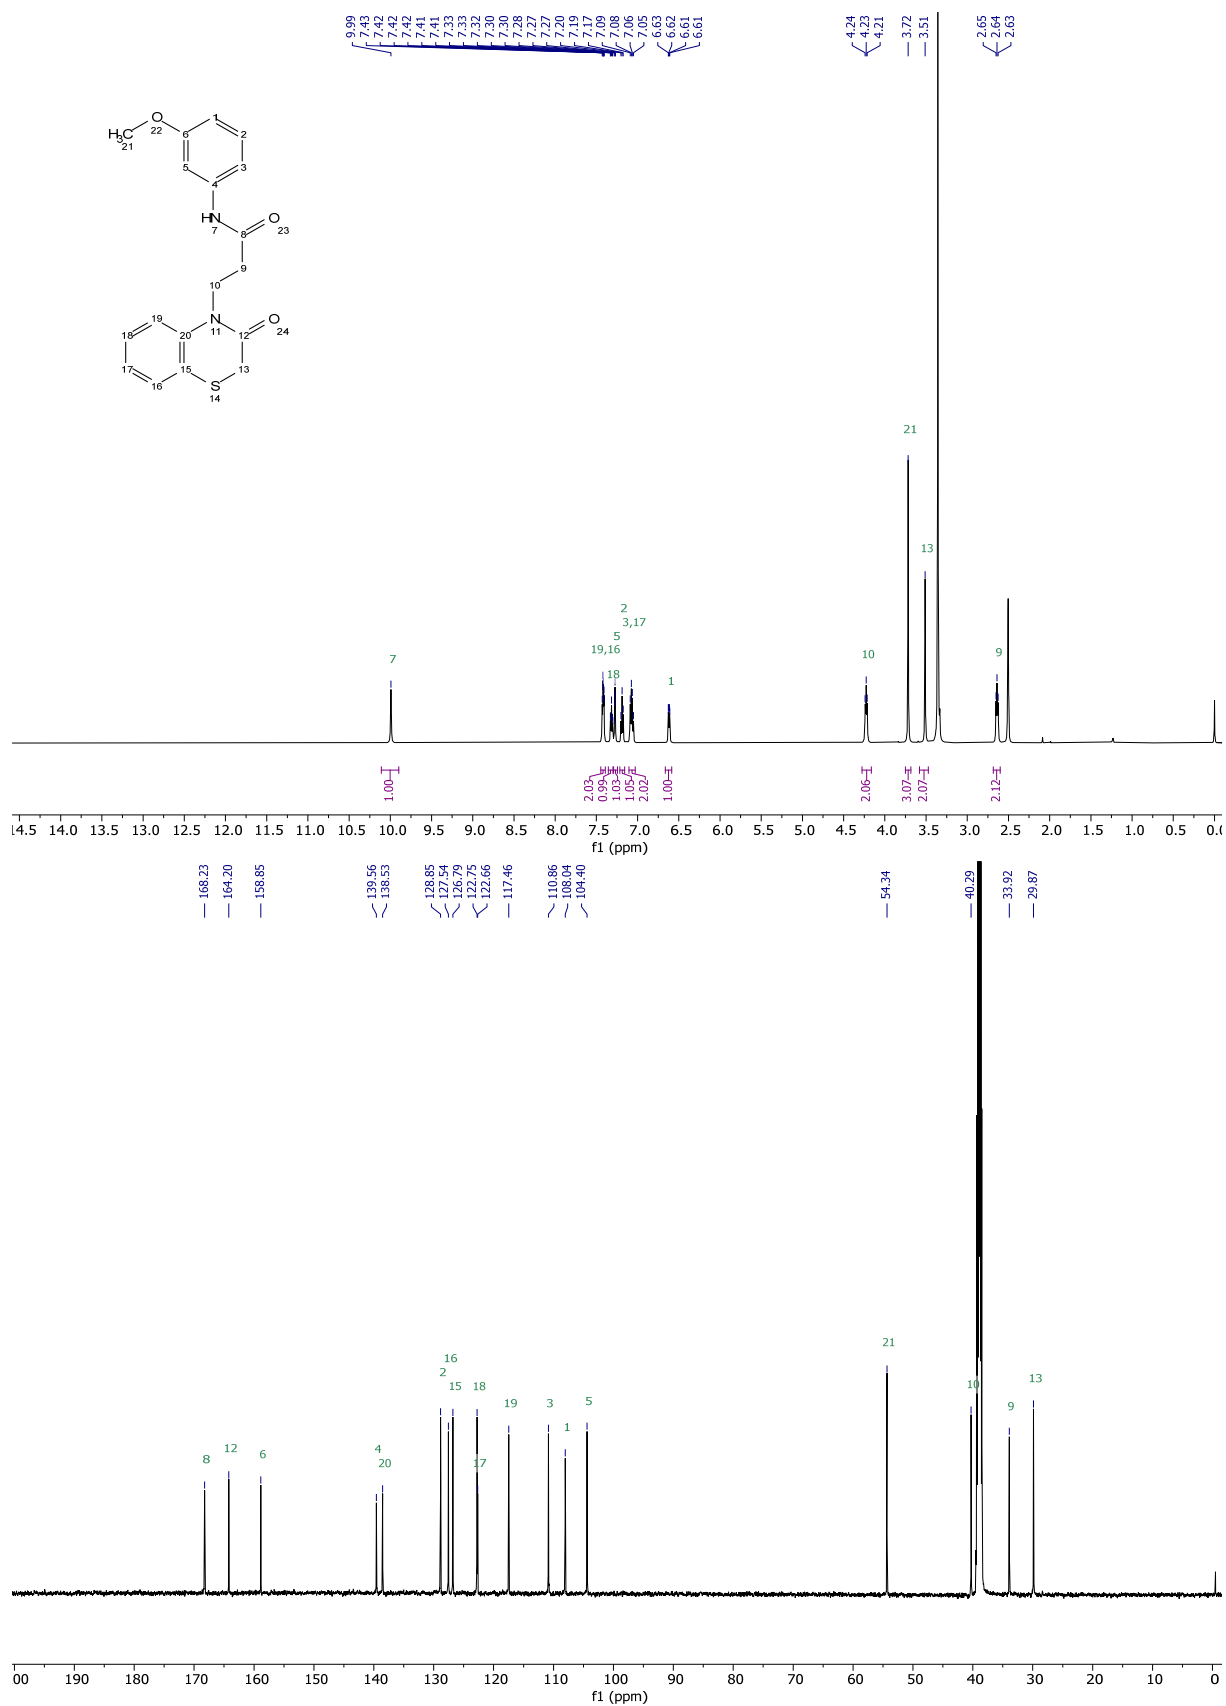

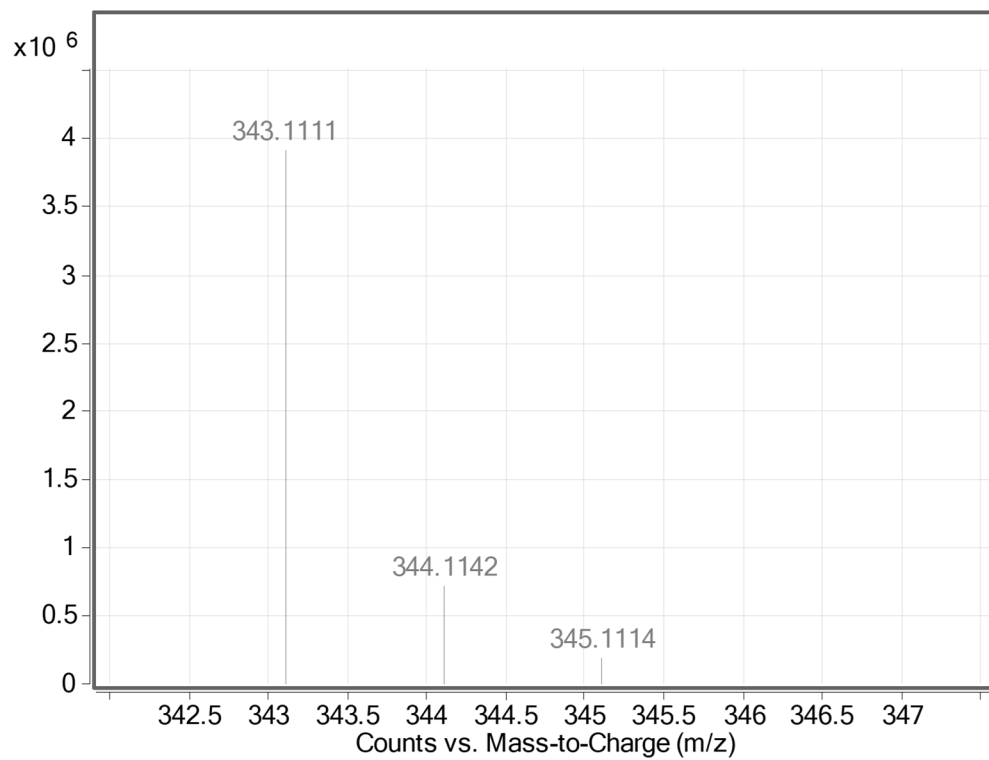

***N*-(4-methoxyphenyl)-3-(3-oxo-2,3-dihydro-4*H*-benzo[*b*][1,4]thiazin-4-yl)propanamide (20)**

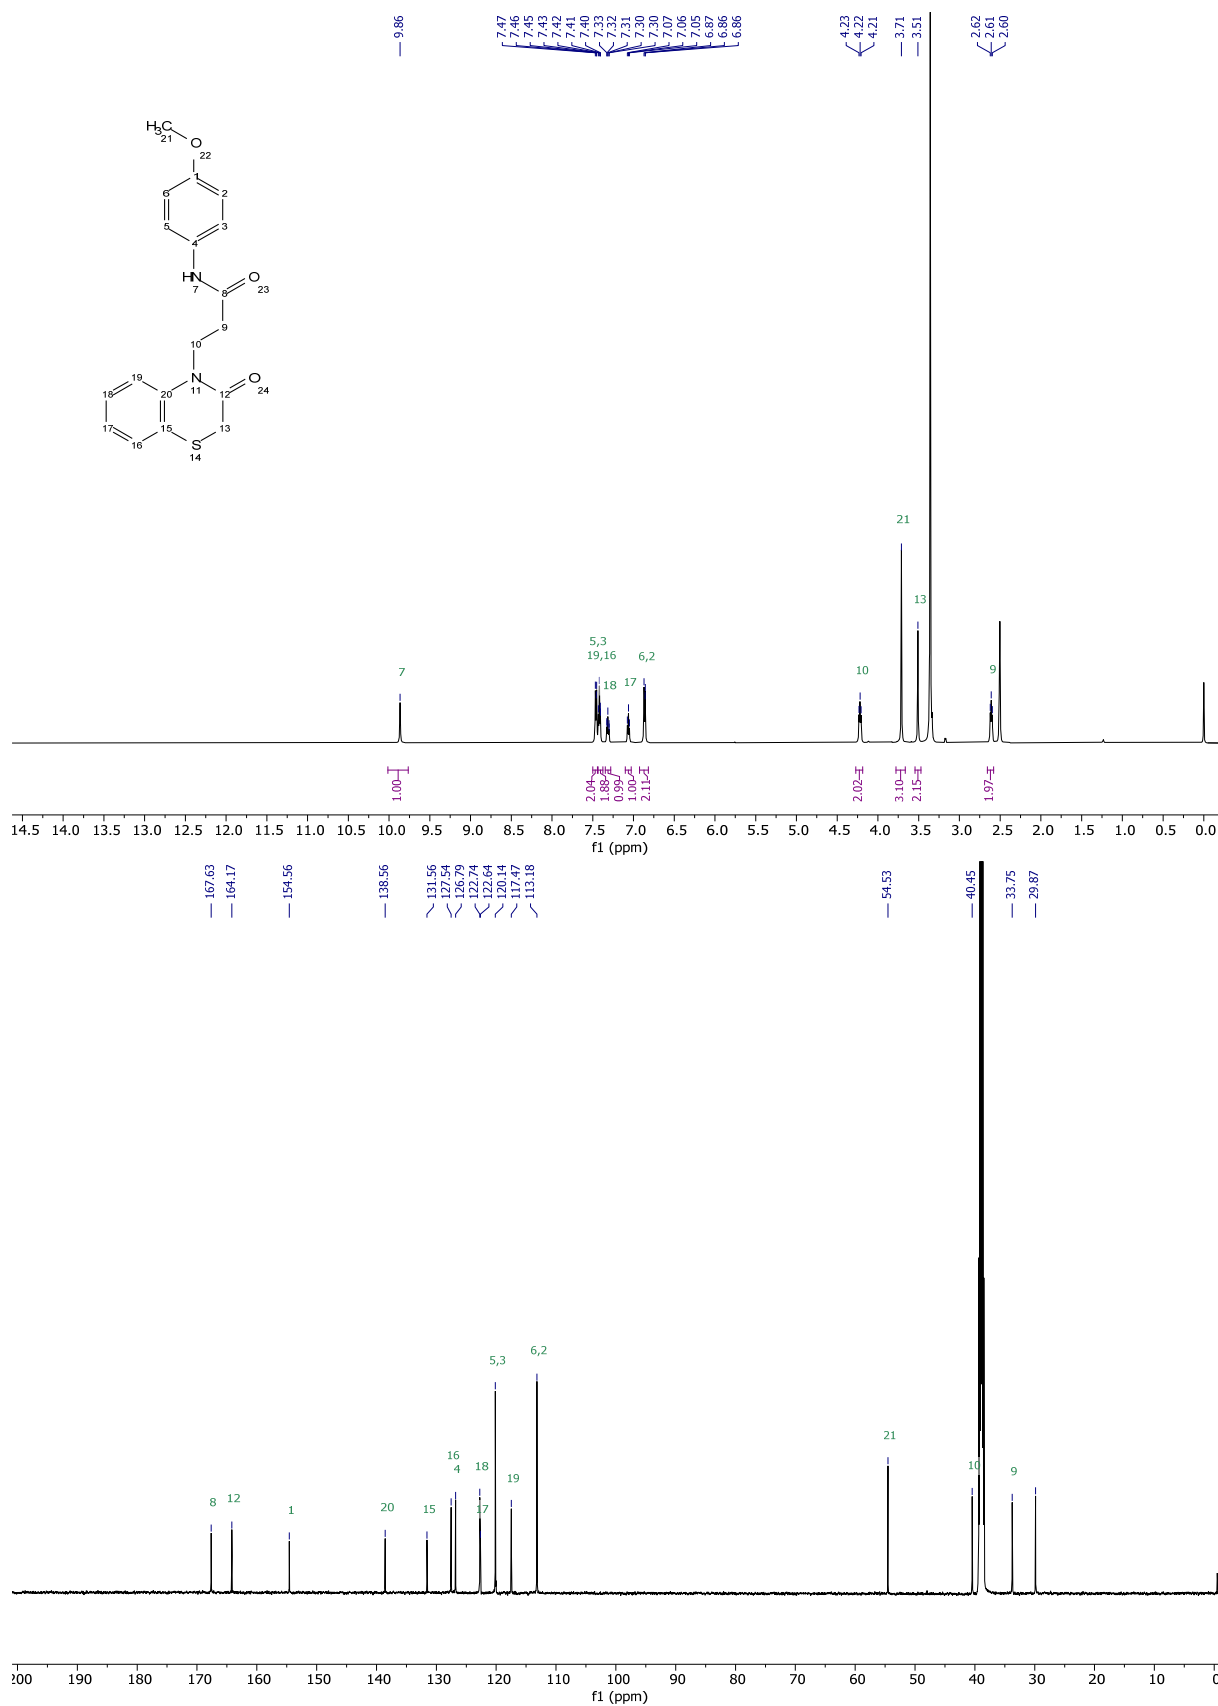

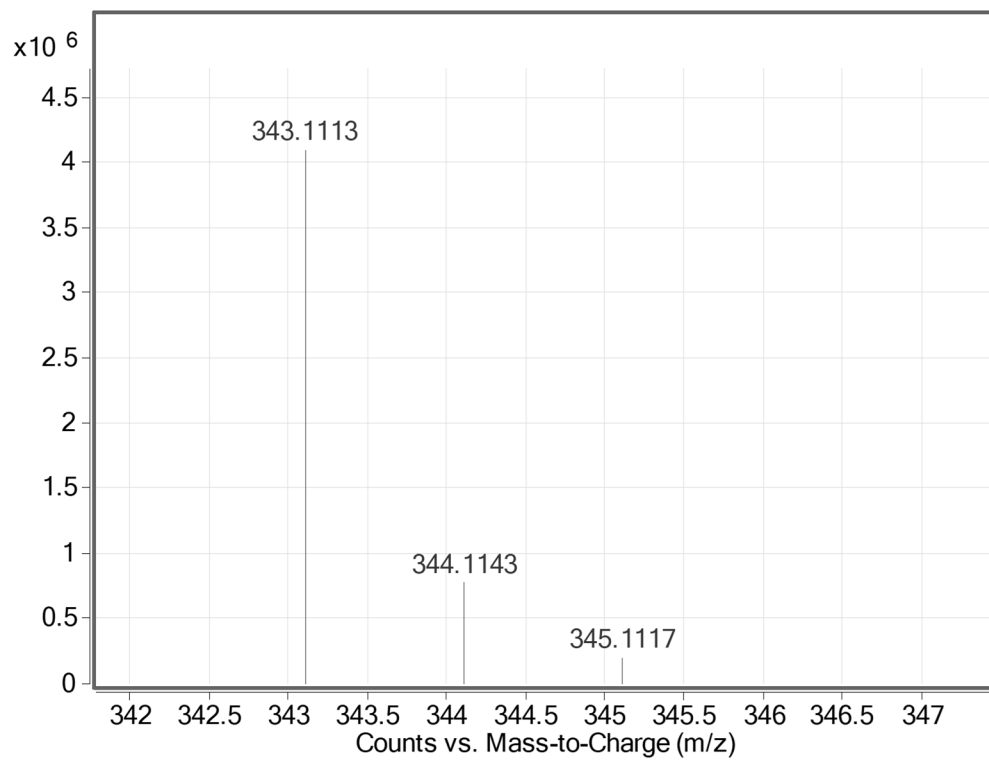

***N*-(2-nitrophenyl)-3-(3-oxo-2,3-dihydro-4*H*-benzo[*b*][1,4]thiazin-4-yl)propanamide (21)**

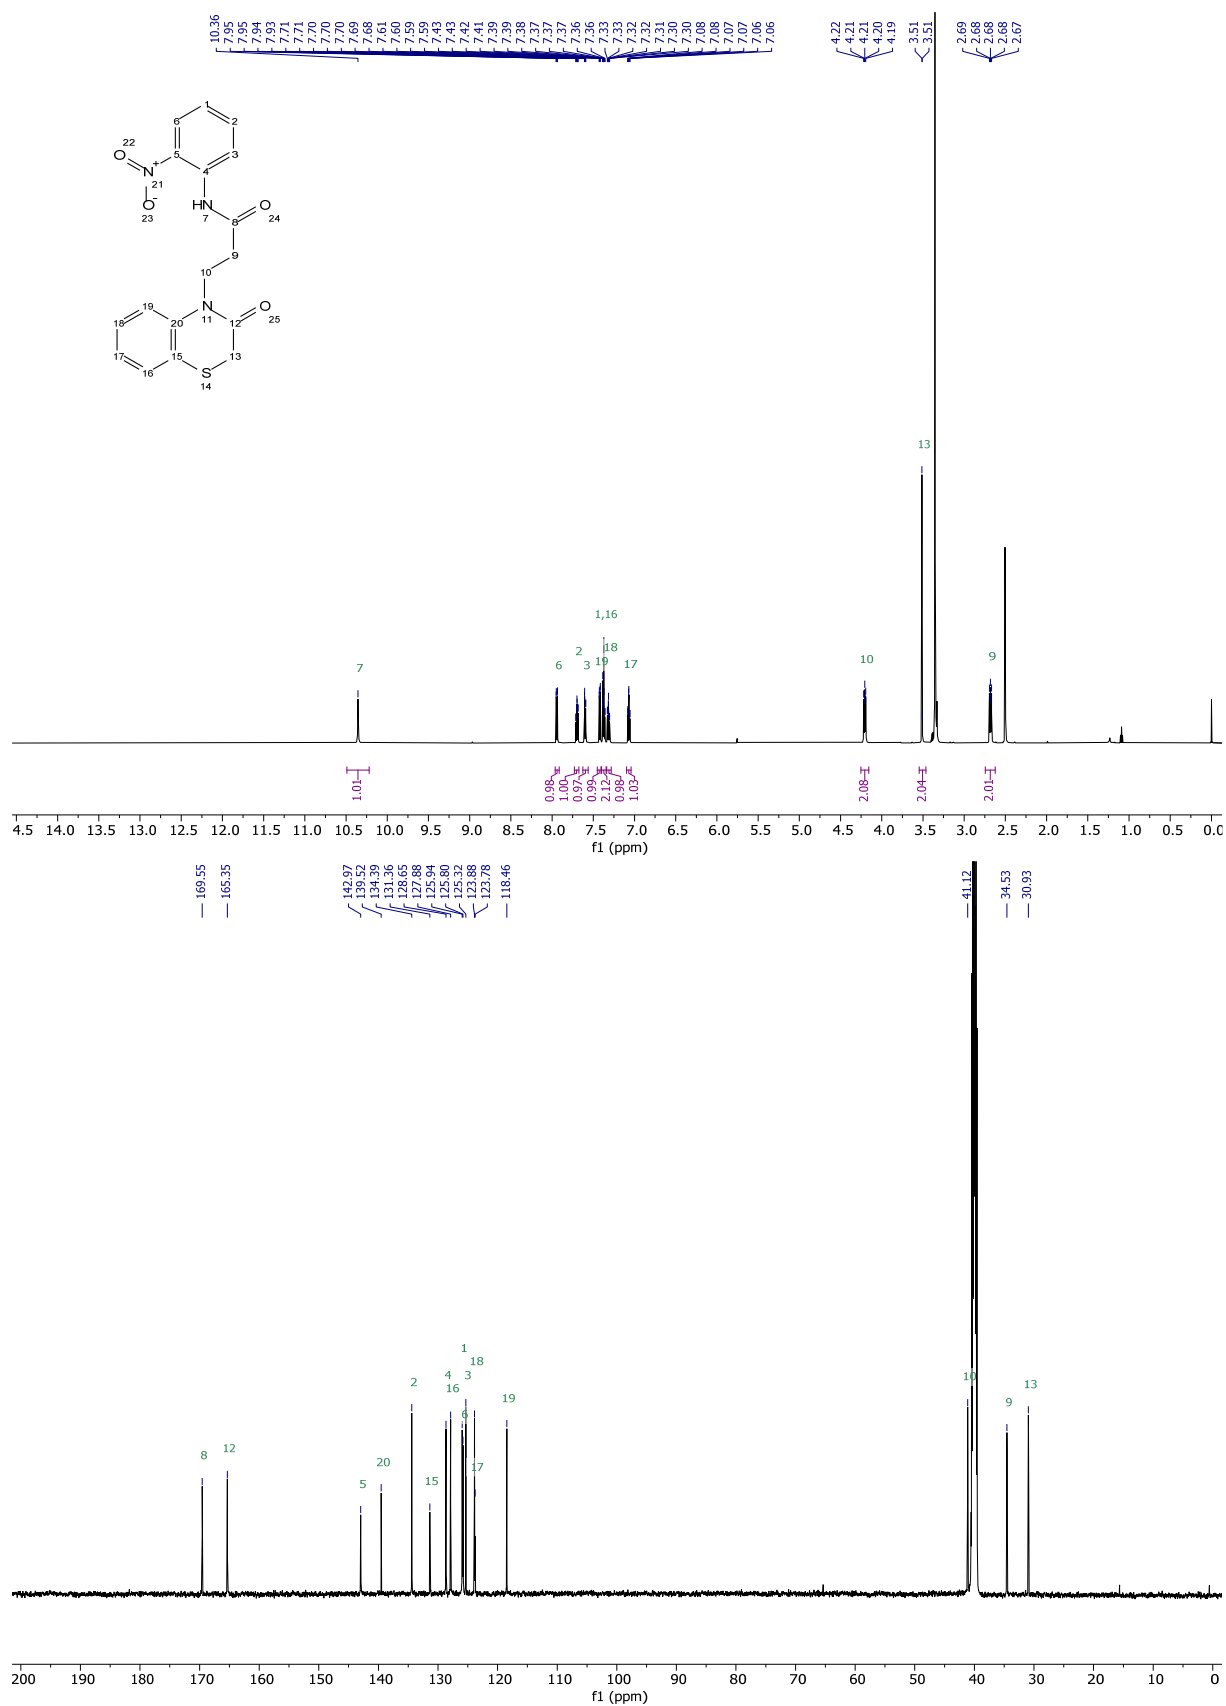

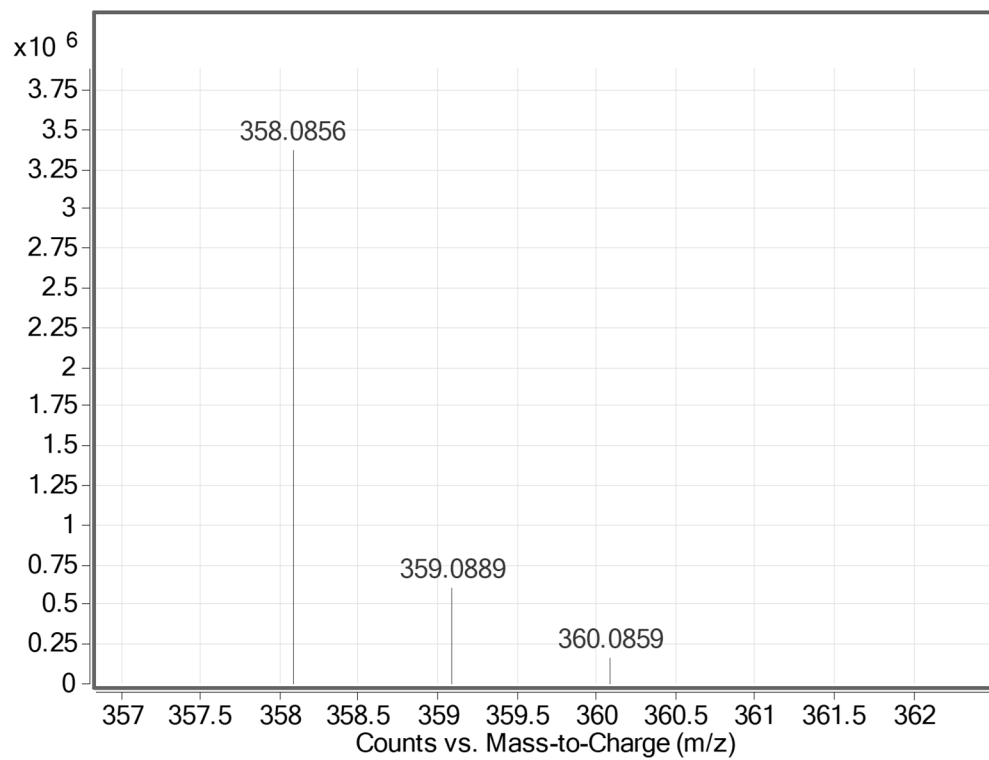



[illegible]

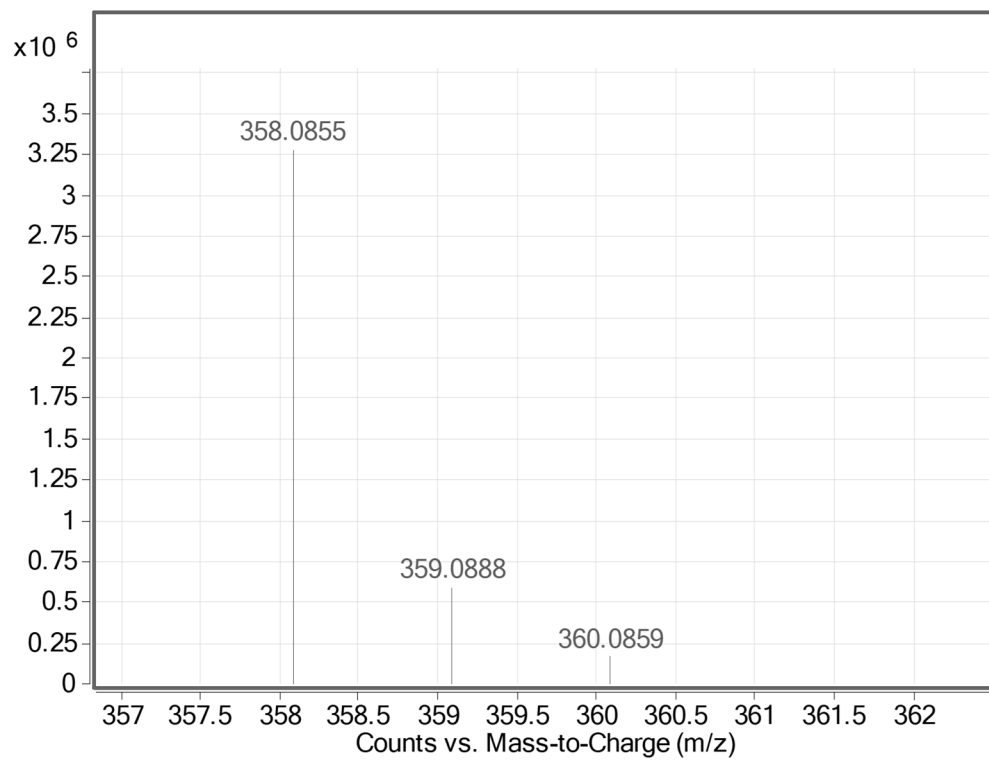

***N*-(4-nitrophenyl)-3-(3-oxo-2,3-dihydro-4*H*-benzo[*b*][1,4]thiazin-4-yl)propanamide (23)**

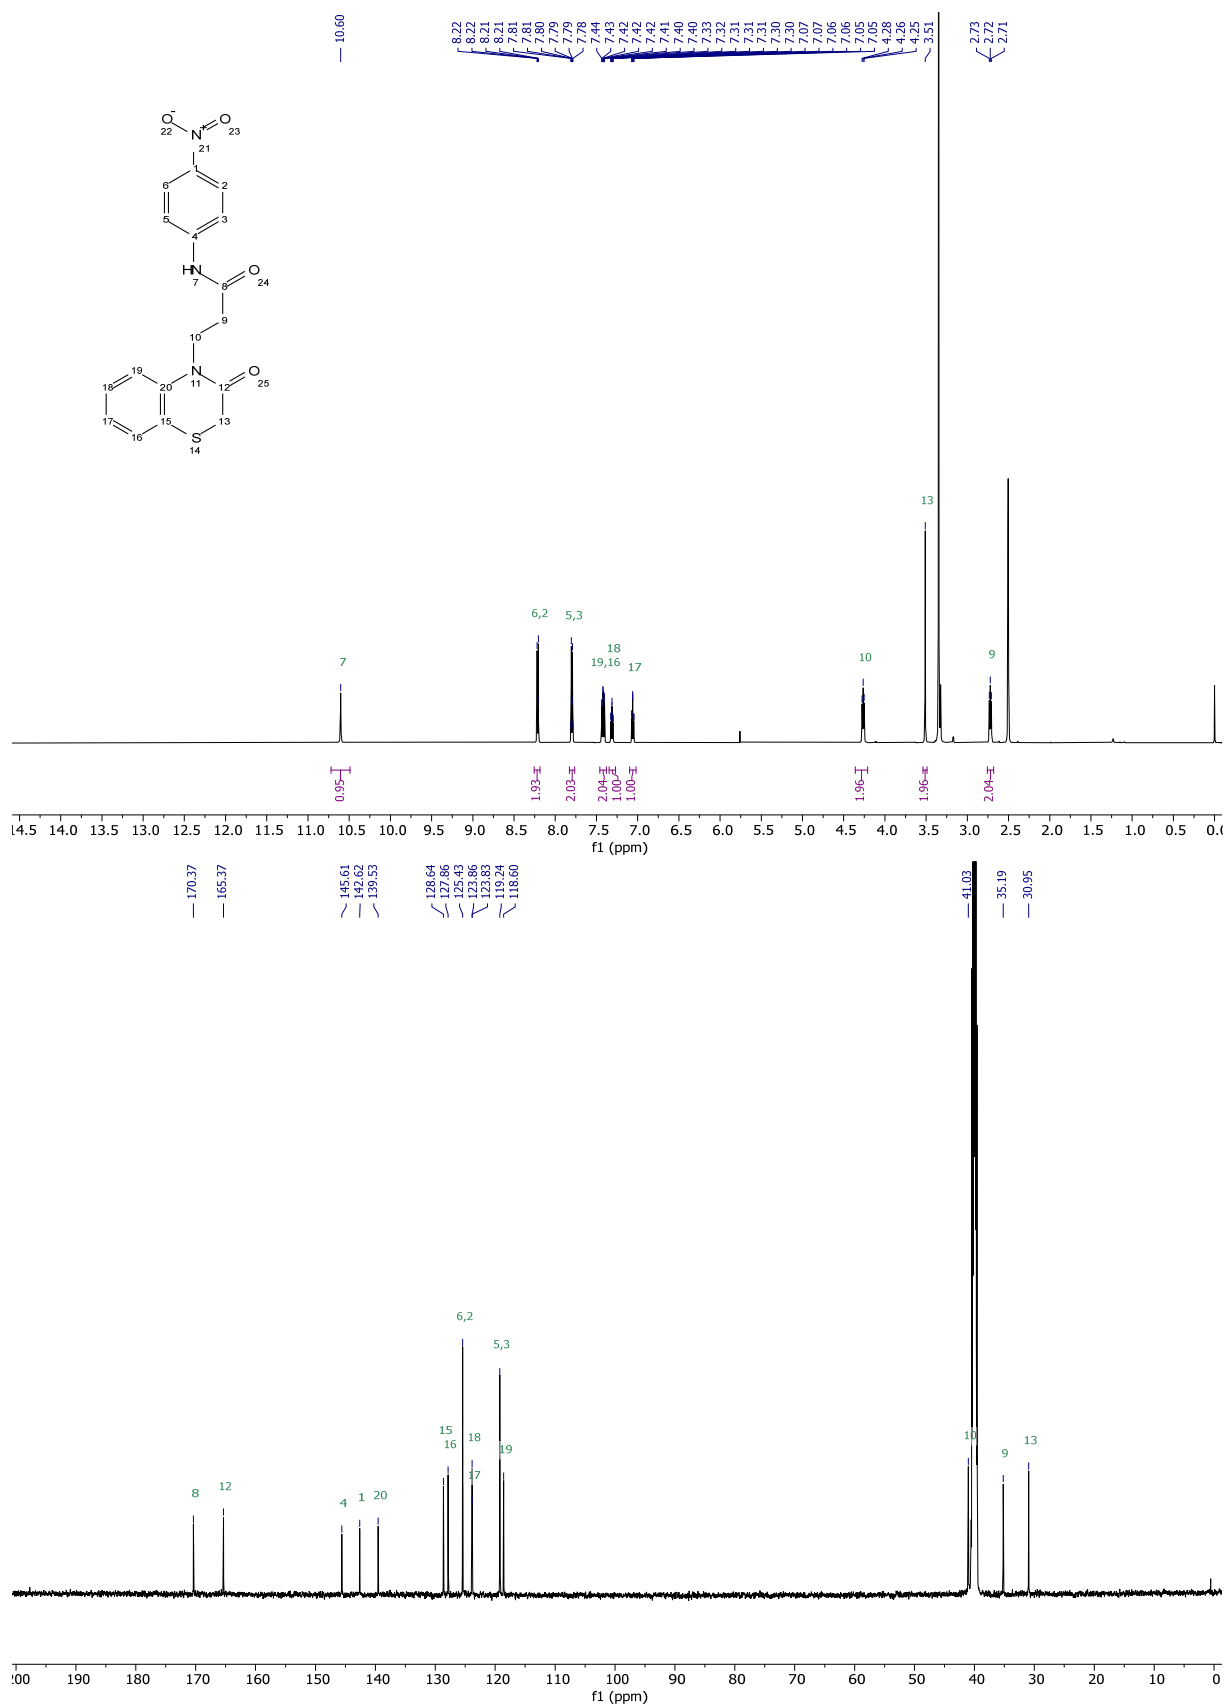

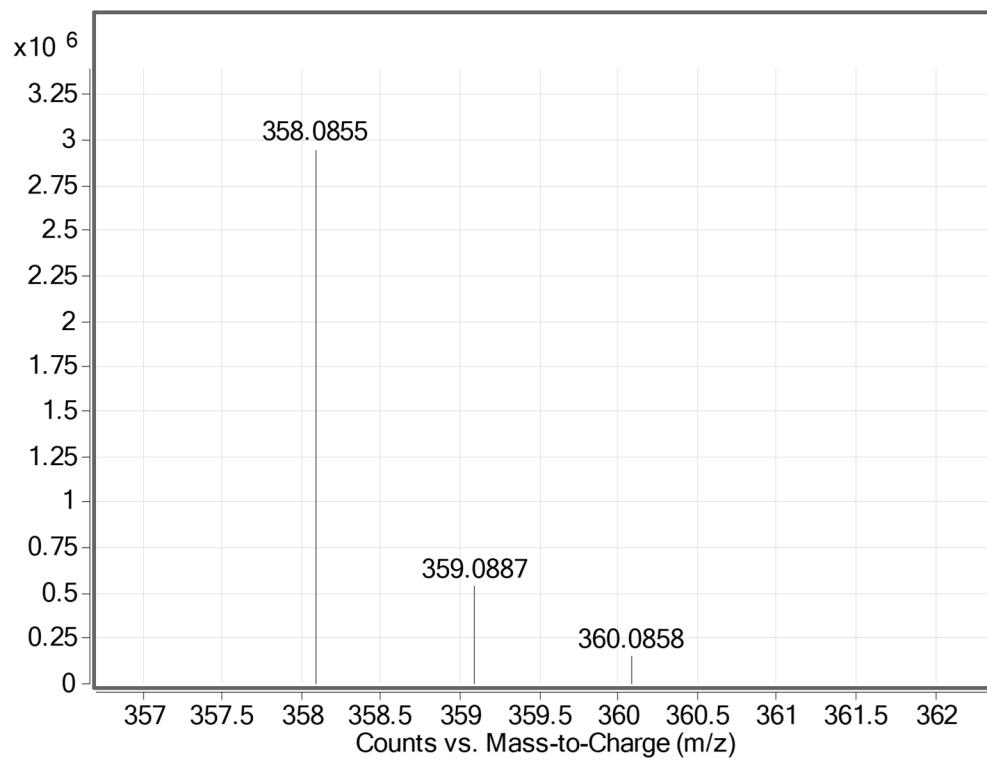

Supplement: s1 [file s1]
